# Supplementary material for: Effects of point mutations in the binding pocket of the mouse major urinary protein MUP20 on ligand affinity and specificity
Source: PubMed Central journal article supplement (PMC6342991; doi:10.1038/s41598-018-36391-3), 2019-01-22
Supplement: 41598_2018_36391_MOESM1_ESM.pdf [file 41598_2018_36391_MOESM1_ESM.pdf]

**Effects of point mutations in the binding pocket of the mouse major urinary  
protein MUP20 on ligand affinity and specificity**

J. Ricatti, L. Acquasaliente, G. Ribaudo, V. De Filippis, M. Bellini, R. Esteban Llovera, S. Barollo, R. Pezzani,  
G. Zagotto, K. C. Persaud, C. Mucignat-Caretta

**Supplementary Material S1**

### Structural analysis and *in silico* comparison of MUP20 WT and mutants

Structural comparison, including sequence alignment, structure alignment and RMSD statistics was carried out using SuperPose Version 1.0 [Rajarshi Maiti. Gary H. Van Domselaar. Haiyan Zhang. and David S. Wishart "SuperPose: a simple server for sophisticated structural superposition" Nucleic Acids Res. 2004 July 1; 32 (Web Server issue): W590W594]. The resulting 3D superimpositions between MUP20 WT and the 7 mutants are reported in the stereographic figures below, together with RMSD data.

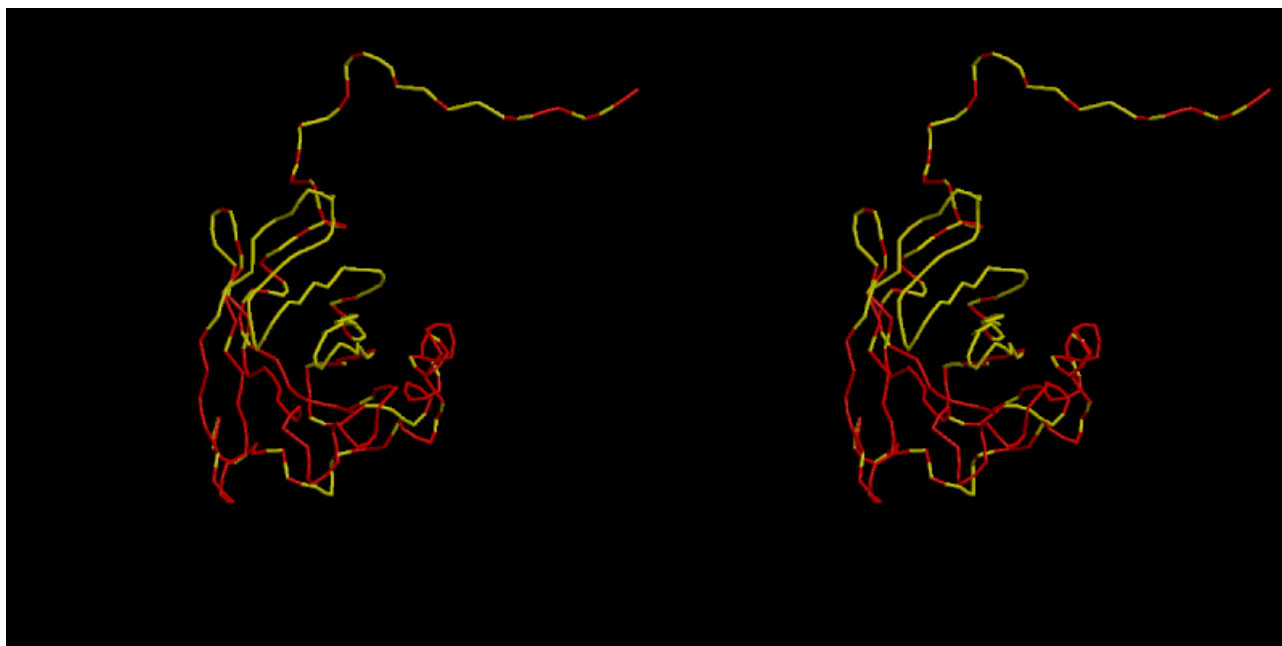

Stereographic 3D superimposition of MUP20 WT and V59T (RMSD = 0.05).

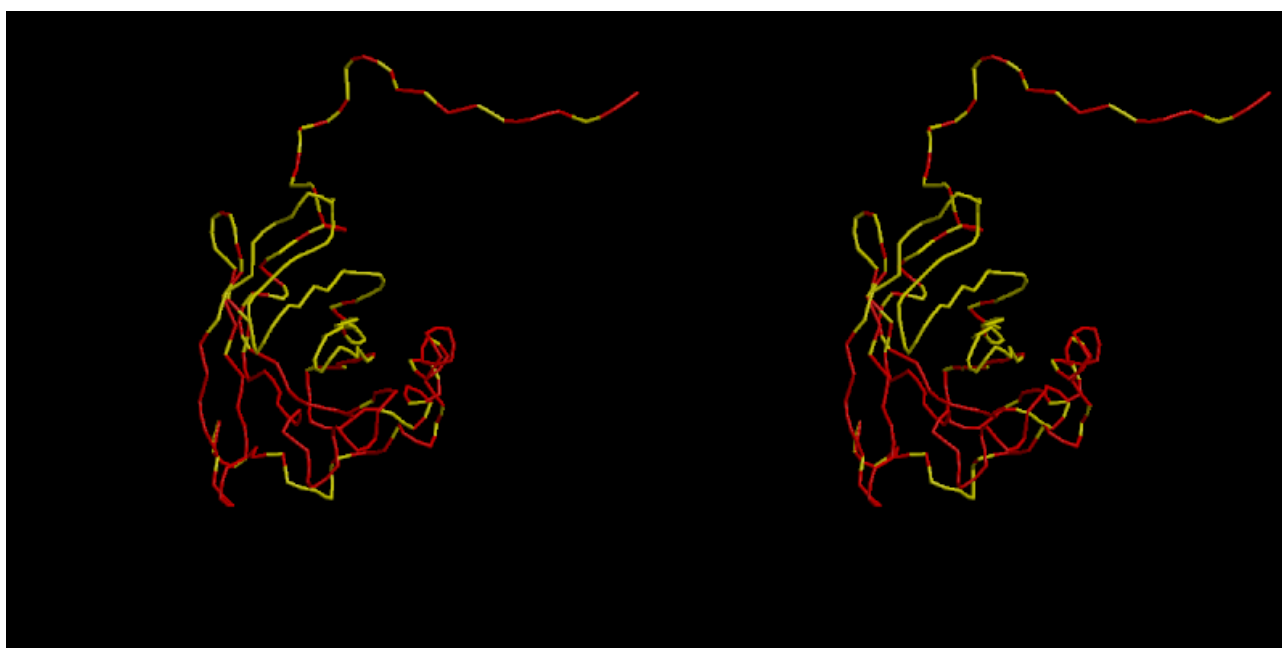

Stereographic 3D superimposition of MUP20 WT and L88Q (RMSD = 0.04).

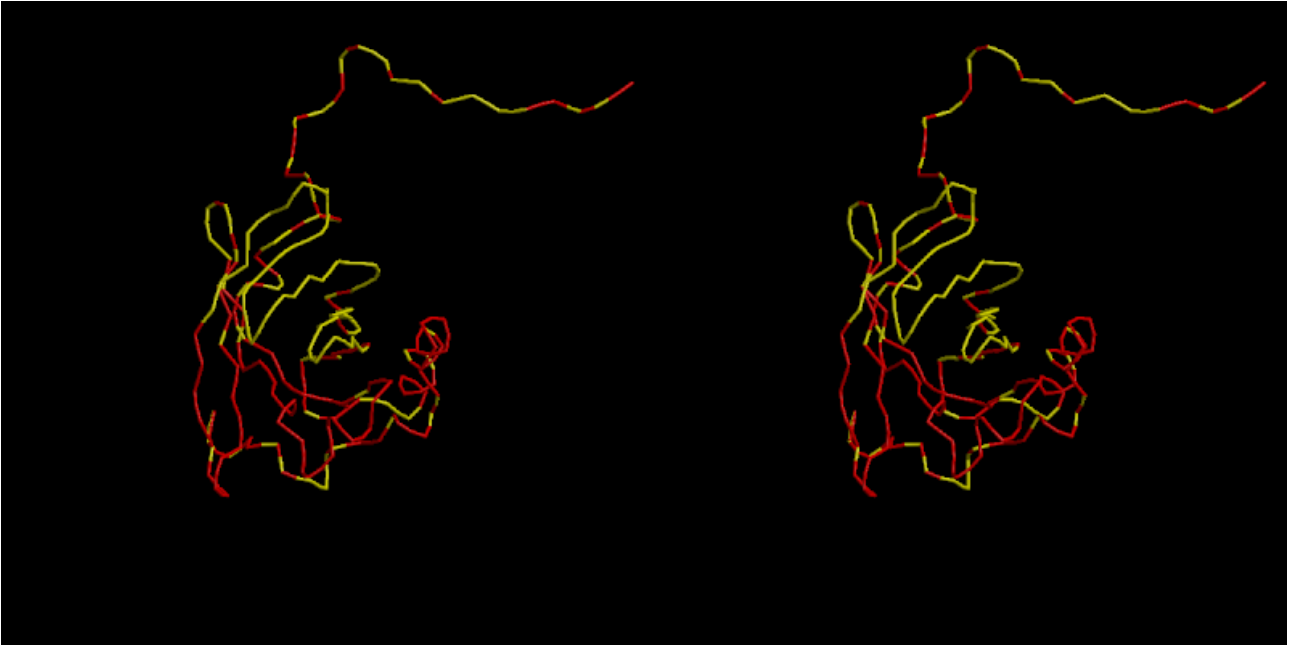

Stereographic 3D superimposition of MUP20 WT and Y103D (RMSD = 0.06).

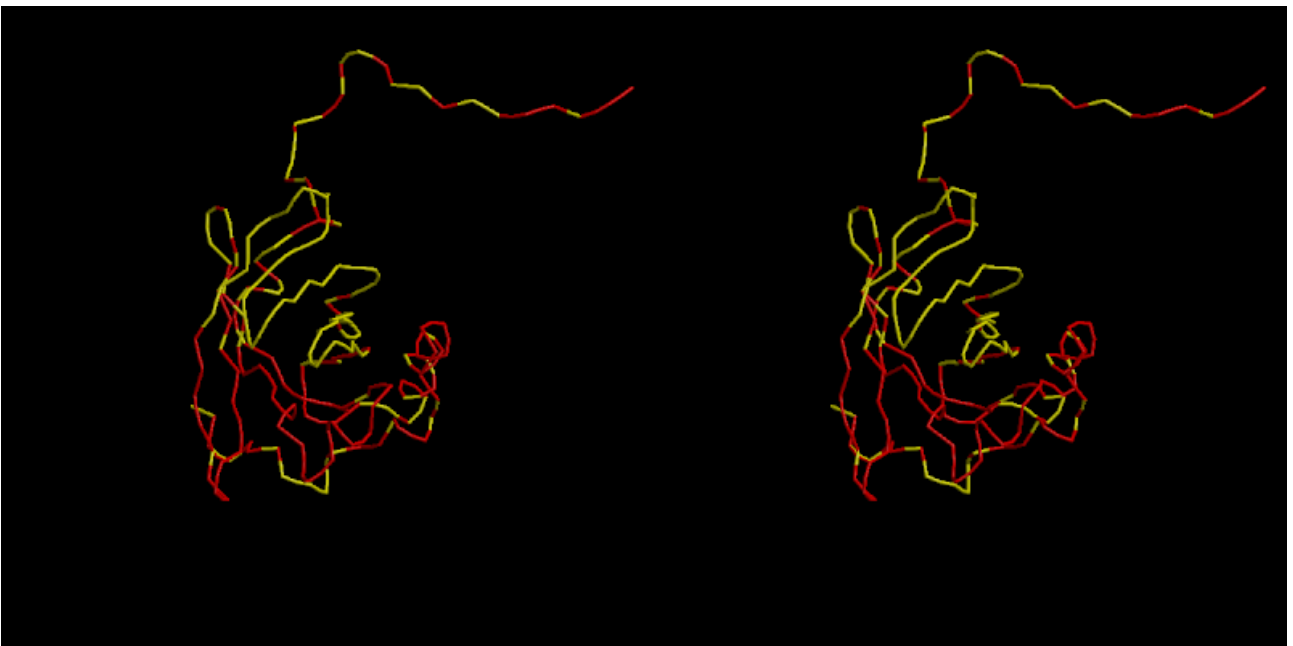

Stereographic 3D superimposition of MUP20 WT and Y103R (RMSD = 0.05).

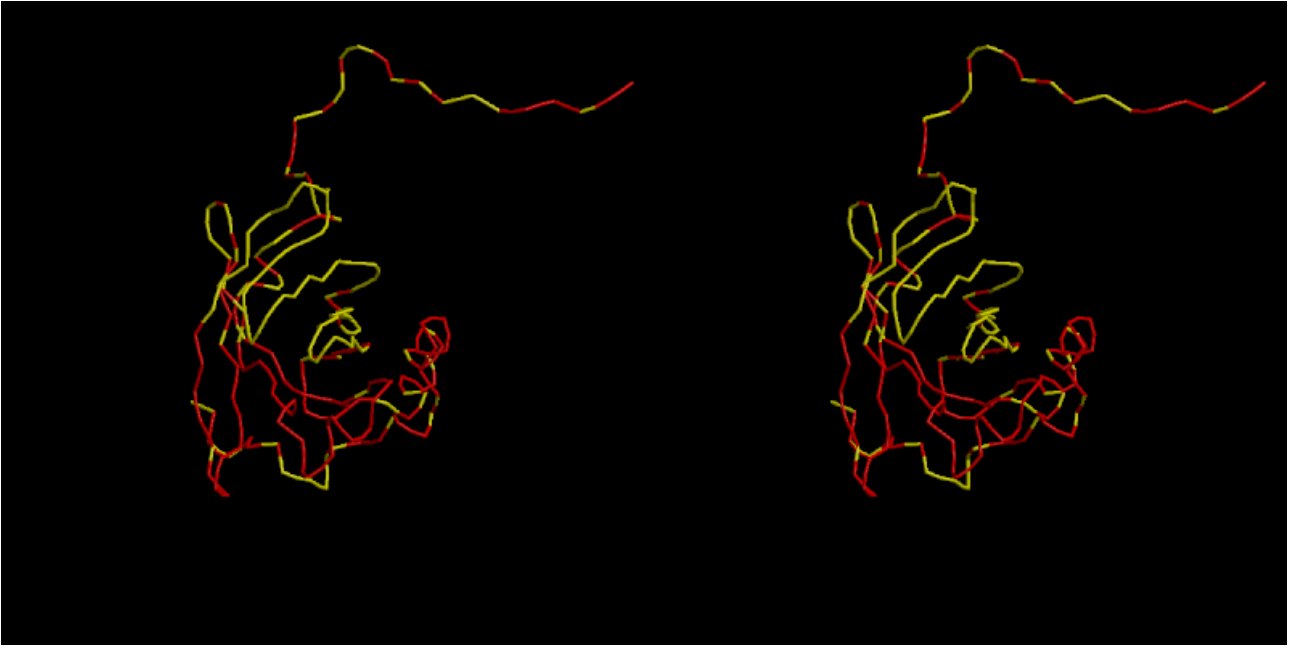

Stereographic 3D superimposition of MUP20 WT and N107L (RMSD = 0.01).

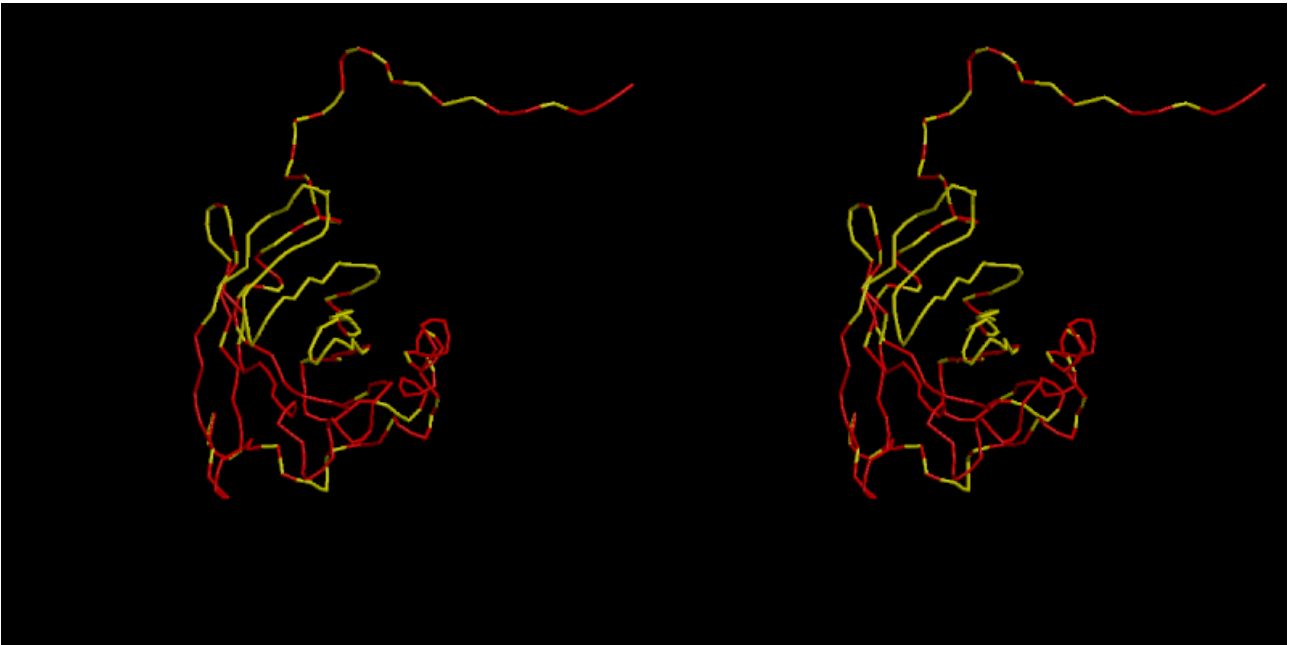

Stereographic 3D superimposition of MUP20 WT and L124V (RMSD = 0.01).

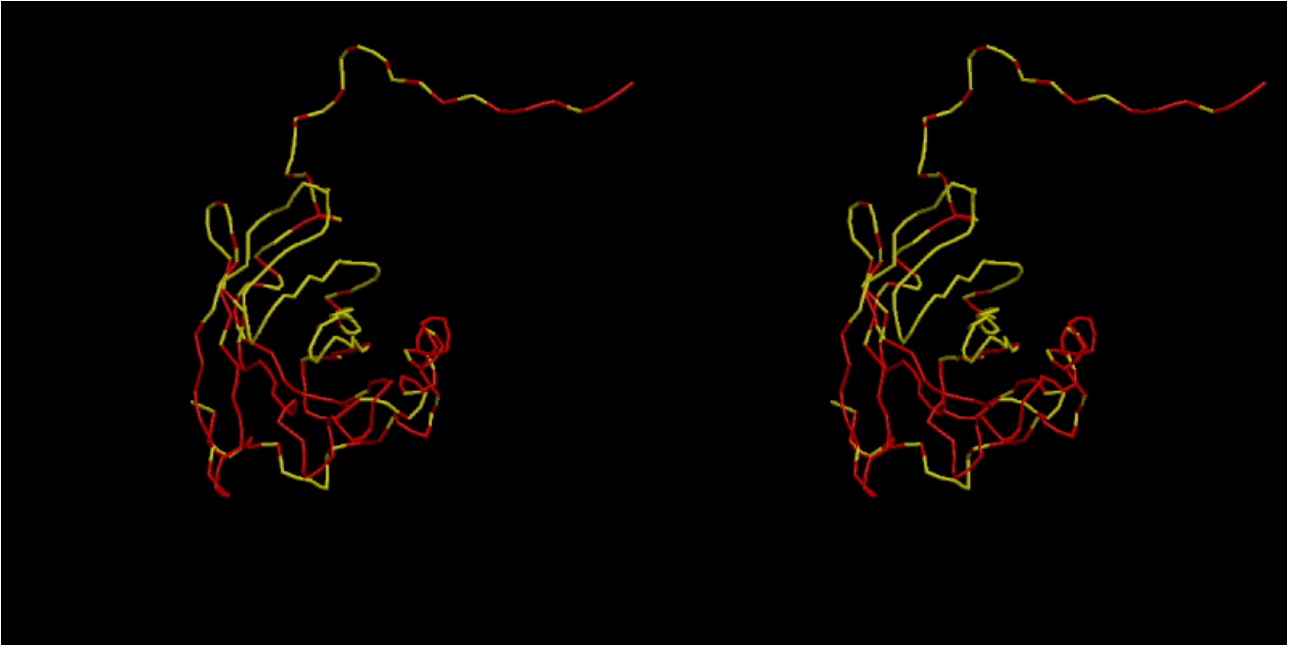

Stereographic 3D superimposition of MUP20 WT and E137K (RMSD = 0.09).

## Calculated 2D interaction pattern of the ligands with MUP20 mutants

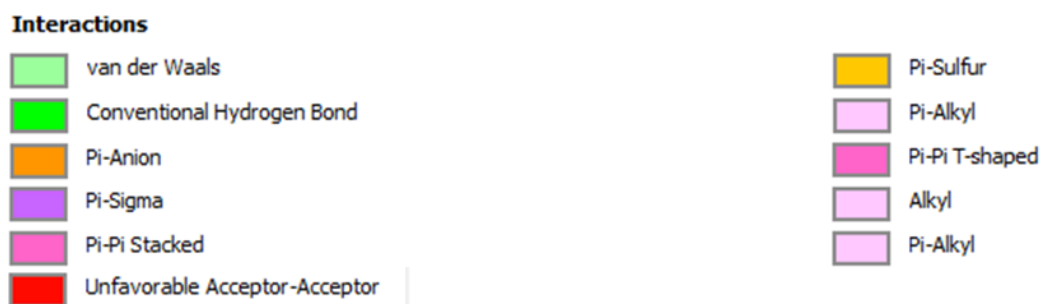

Color key of the represented interactions. Residue name and number of the interacting residues are shown in the pictures below, together with the distance between the ligand and the residue (expressed in Å). Pictures were obtained using Discovery Studio (Dassault Systèmes BIOVIA, San Diego).

### MUP20 WT

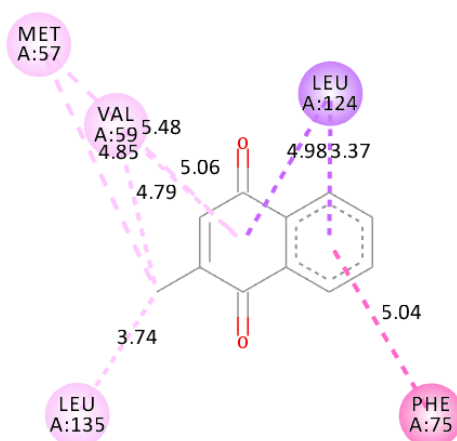

### 2D interaction pattern of MEN.

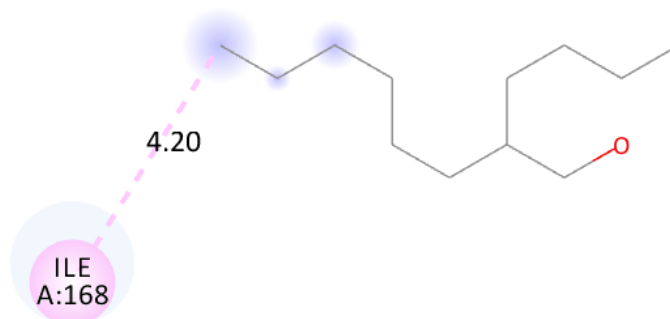

### 2D interaction pattern of OCT.

### MUP20 WT

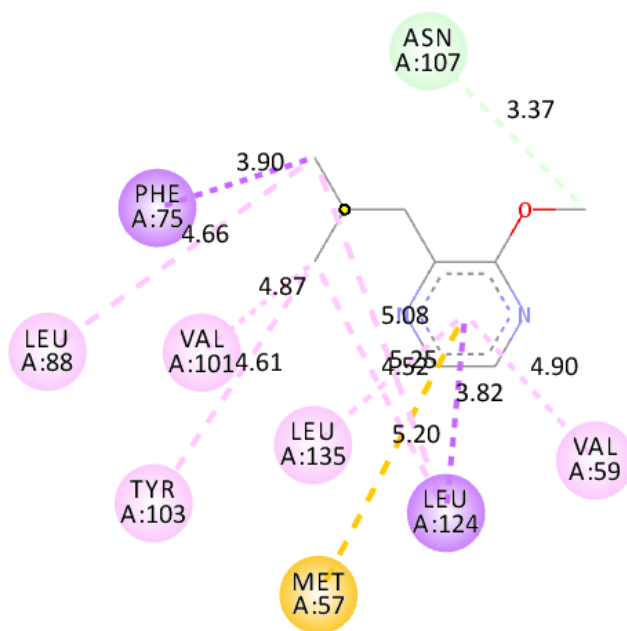

2D interaction pattern of PYR.

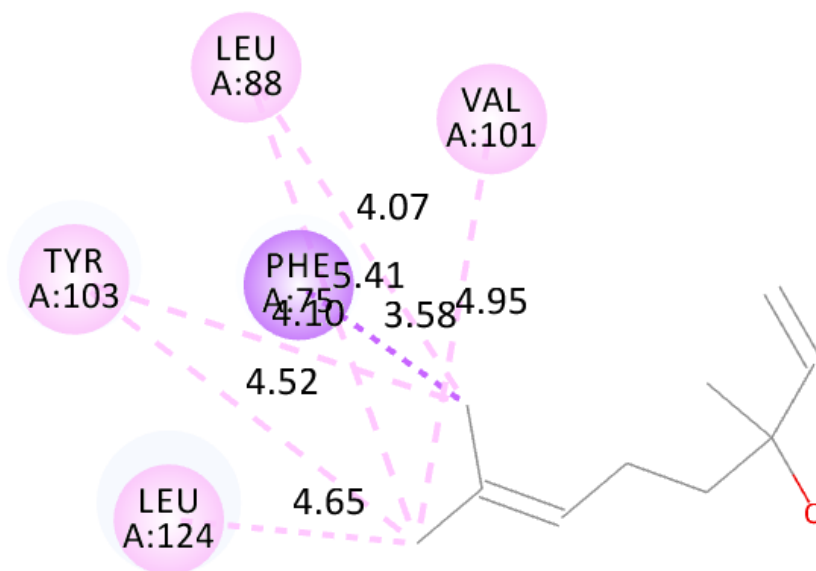

2D interaction pattern of LIN.

### MUP20 WT

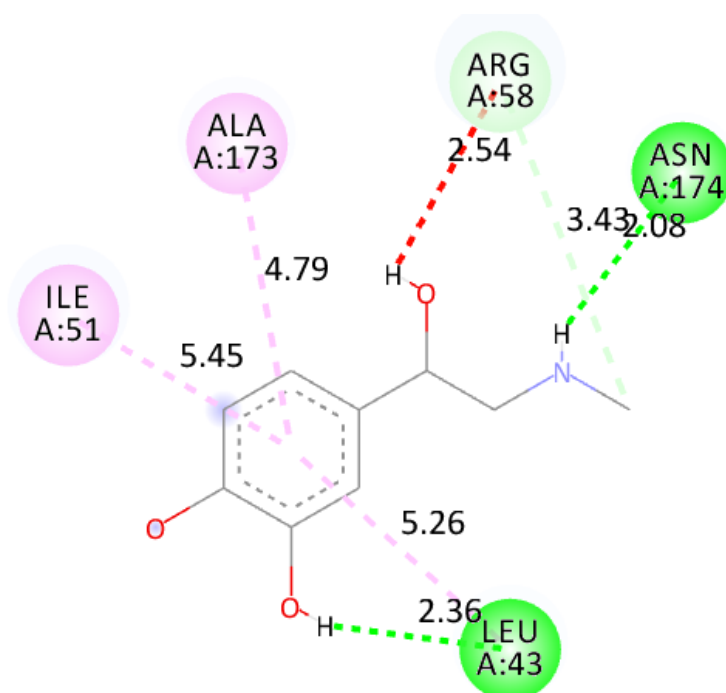

2D interaction pattern of L-ADR.

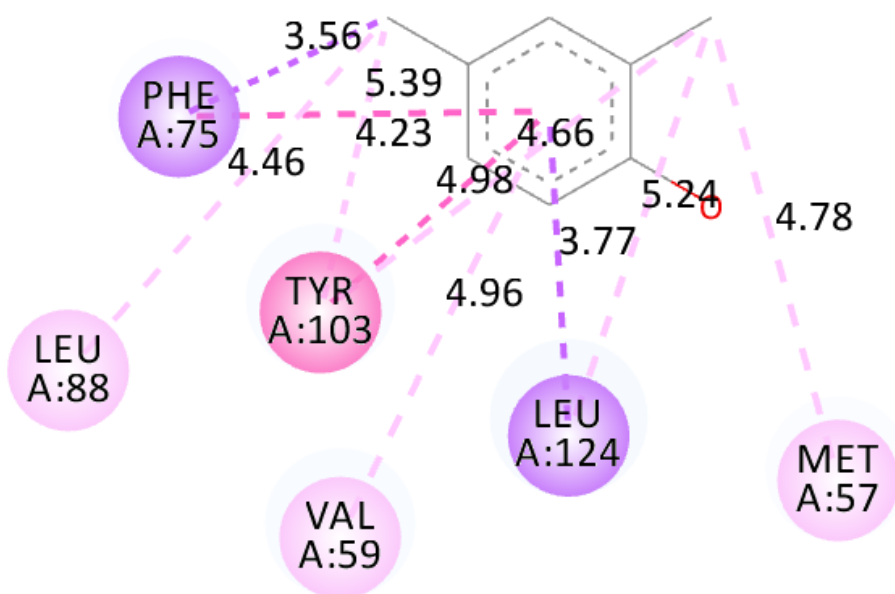

2D interaction pattern of 2,4-DMP.



### V59T

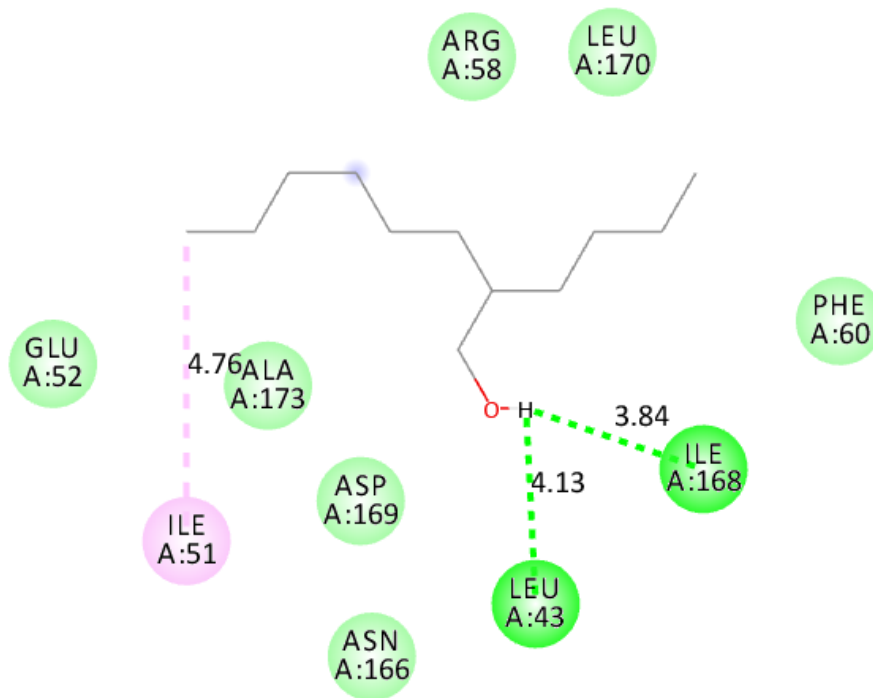

2D interaction pattern of OCT.

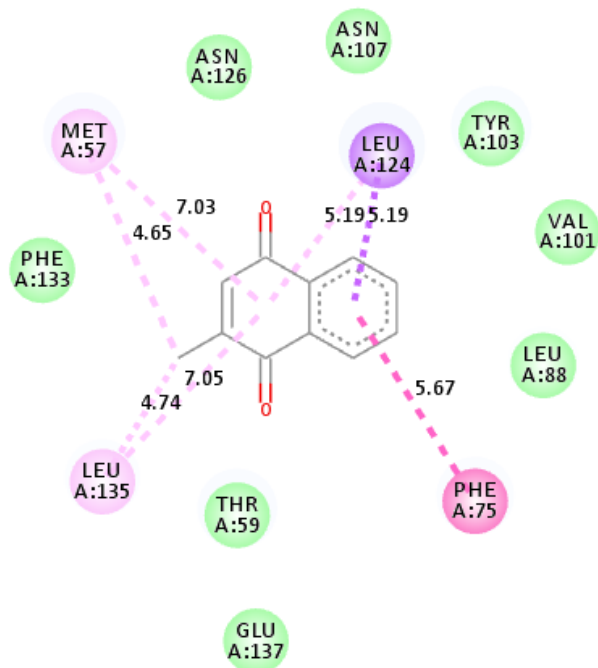

2D interaction pattern of MEN.

### V59T

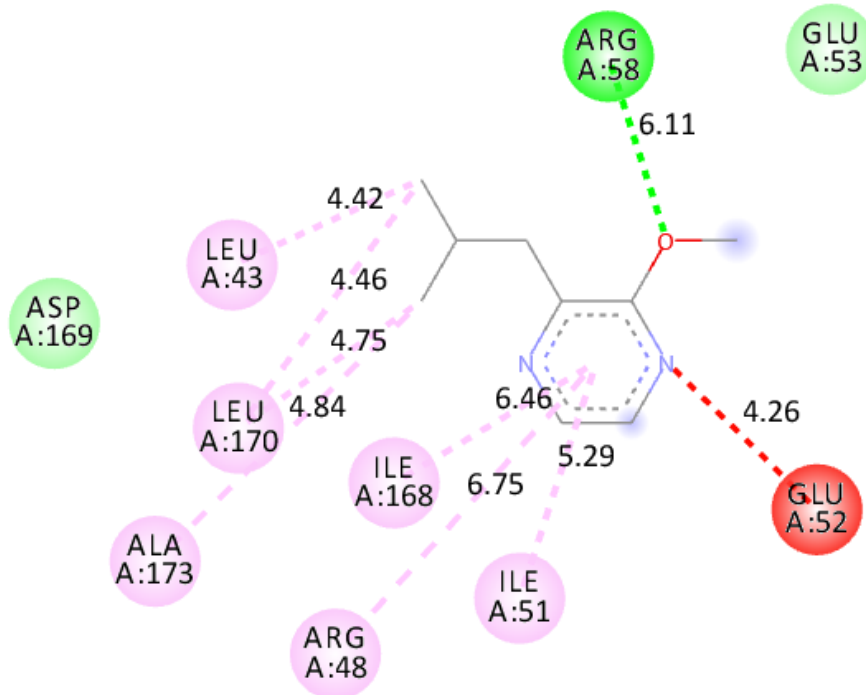

2D interaction pattern of PYR.

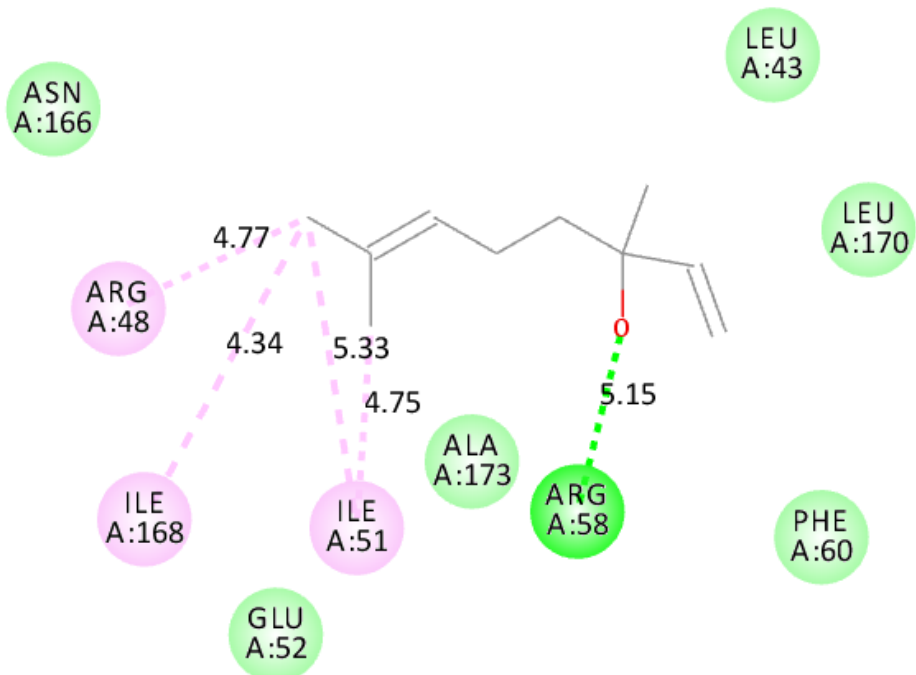

2D interaction pattern of LIN.

## V59T

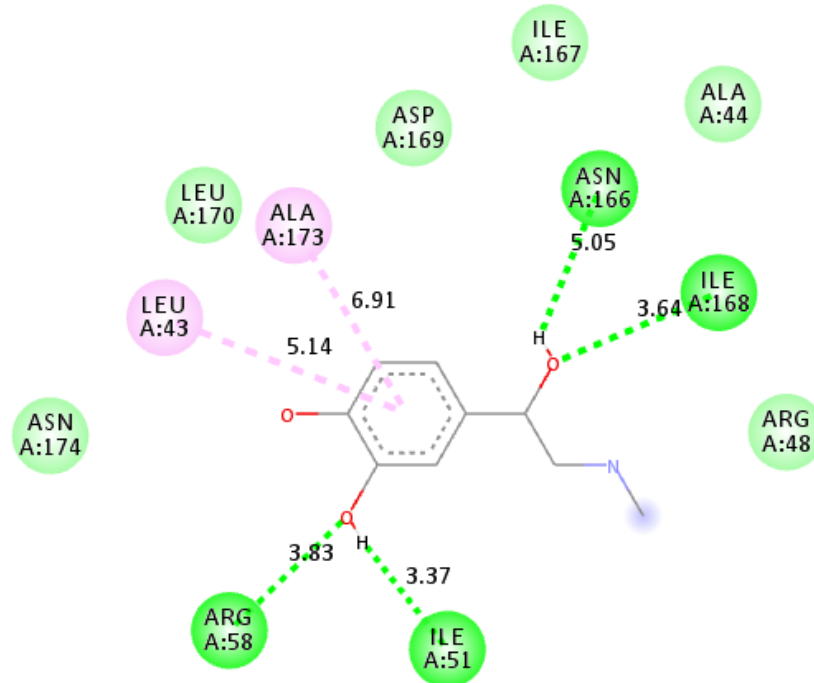

2D interaction pattern of L-ADR.

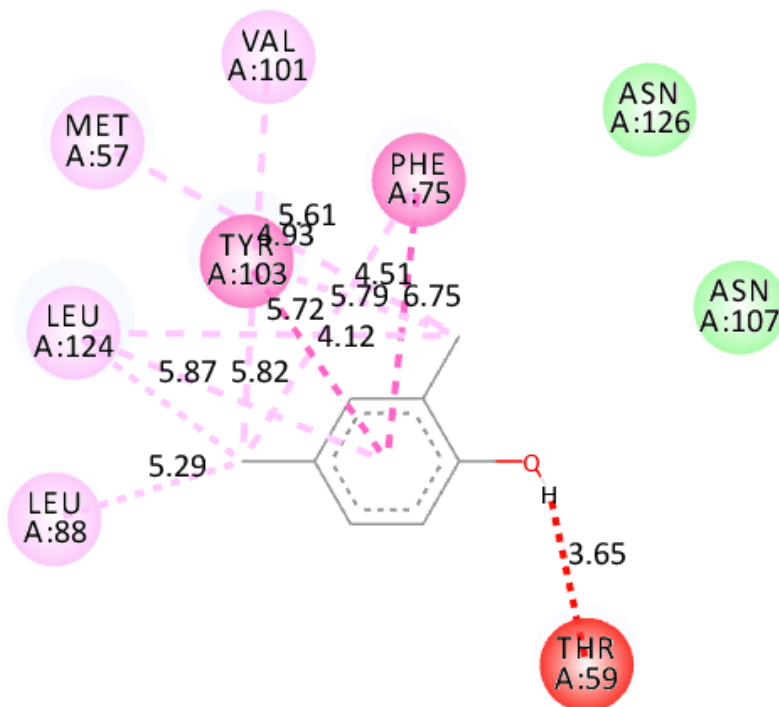

2D interaction pattern of 2,4-DMP.

## L88Q

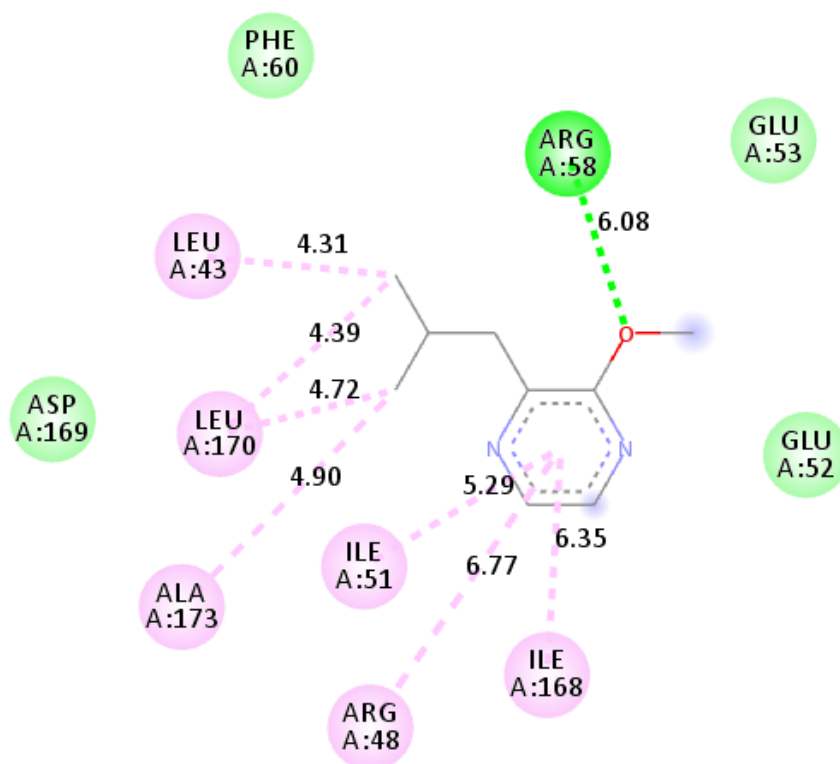

2D interaction pattern of PYR.

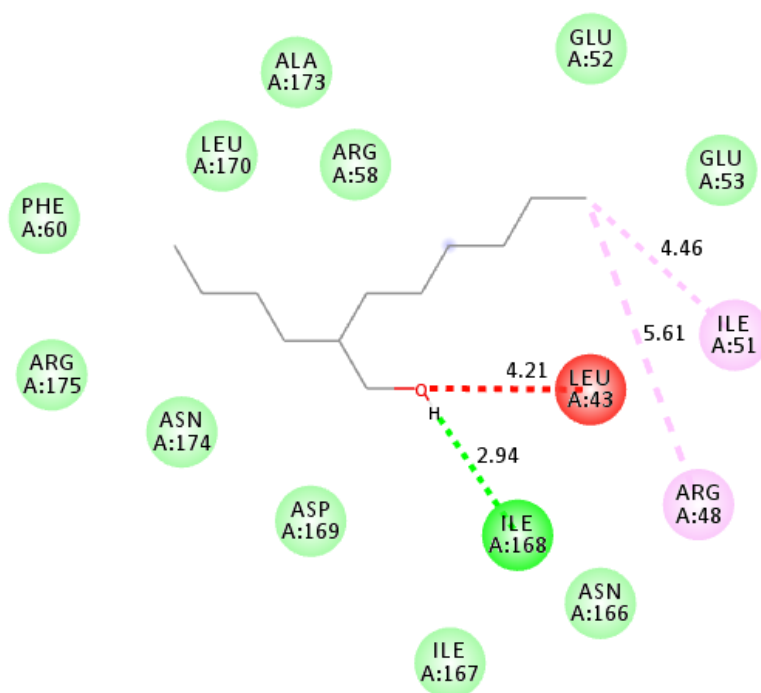

2D interaction pattern of OCT.

## L88Q

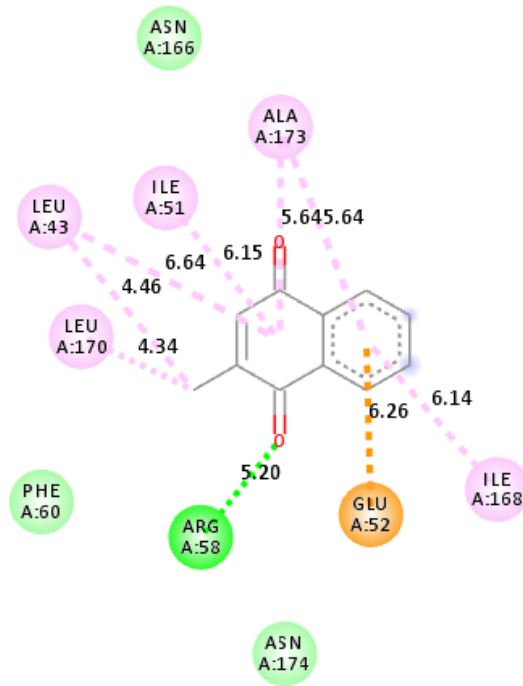

2D interaction pattern of MEN.

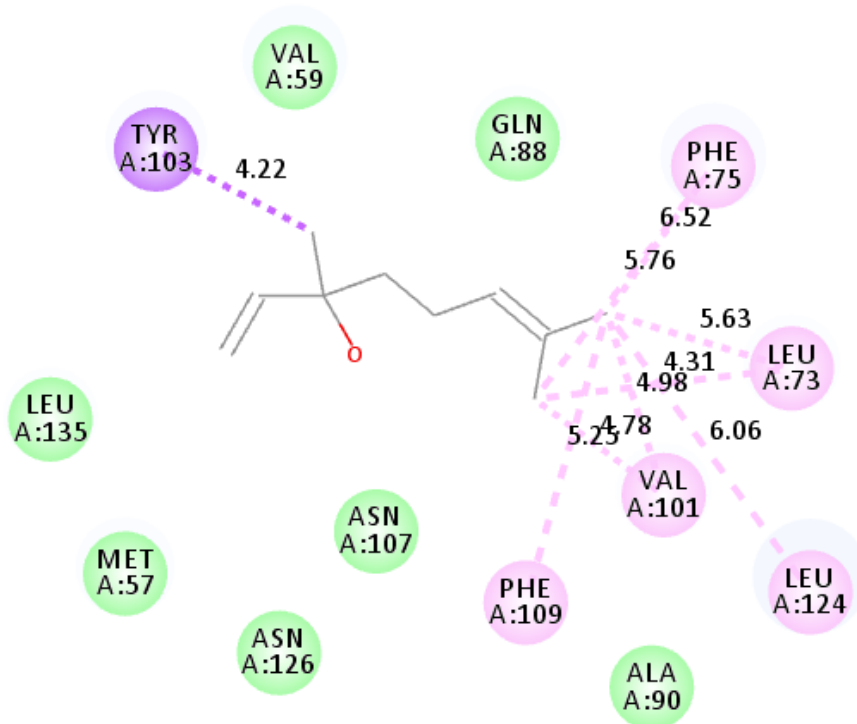

2D interaction pattern of LIN.

### L88Q

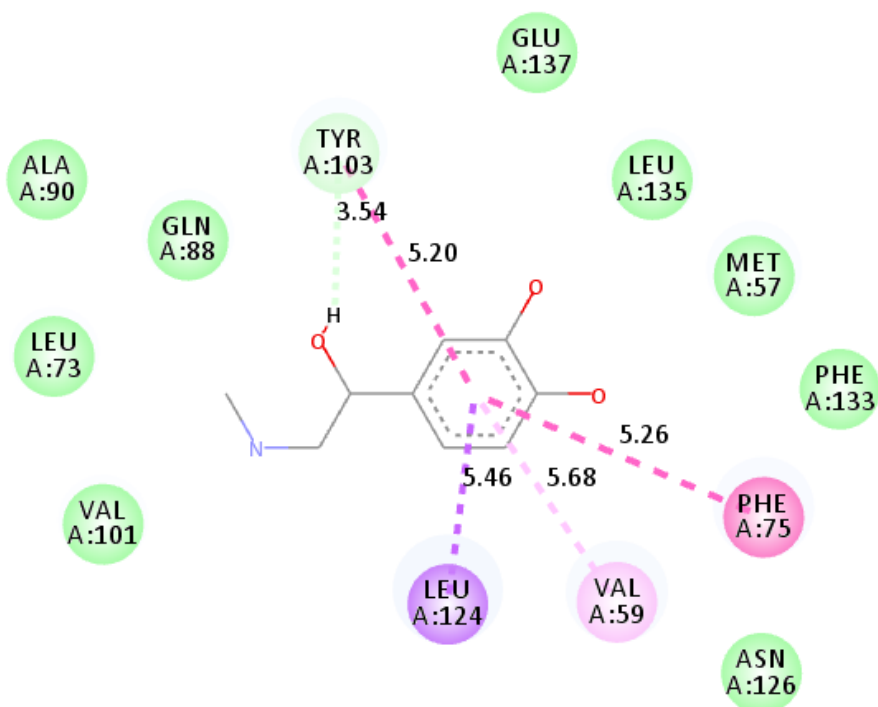

2D interaction pattern of L-ADR.

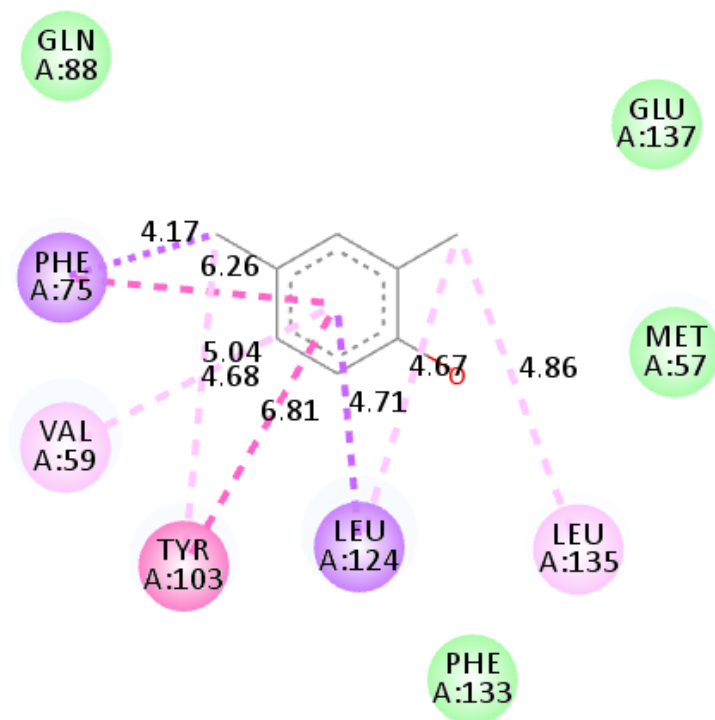

2D interaction pattern of 2,4-DMP.

### Y103D

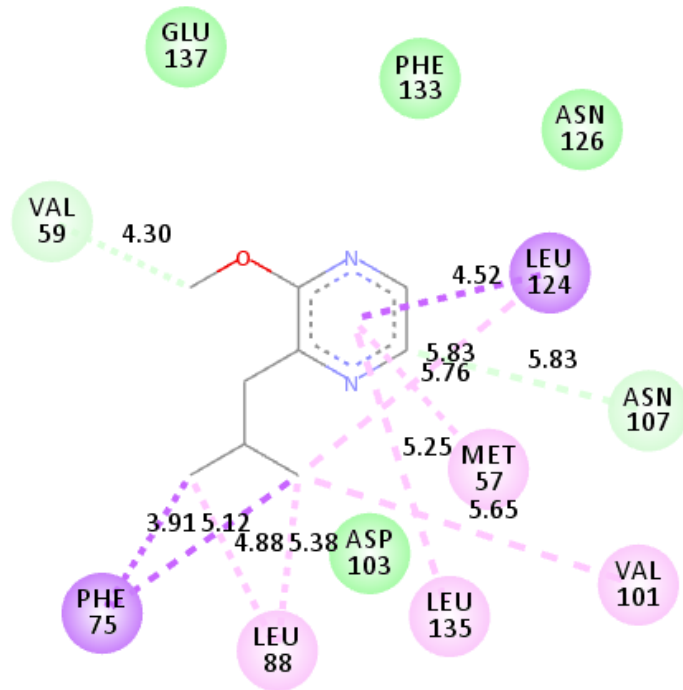

2D interaction pattern of PYR.

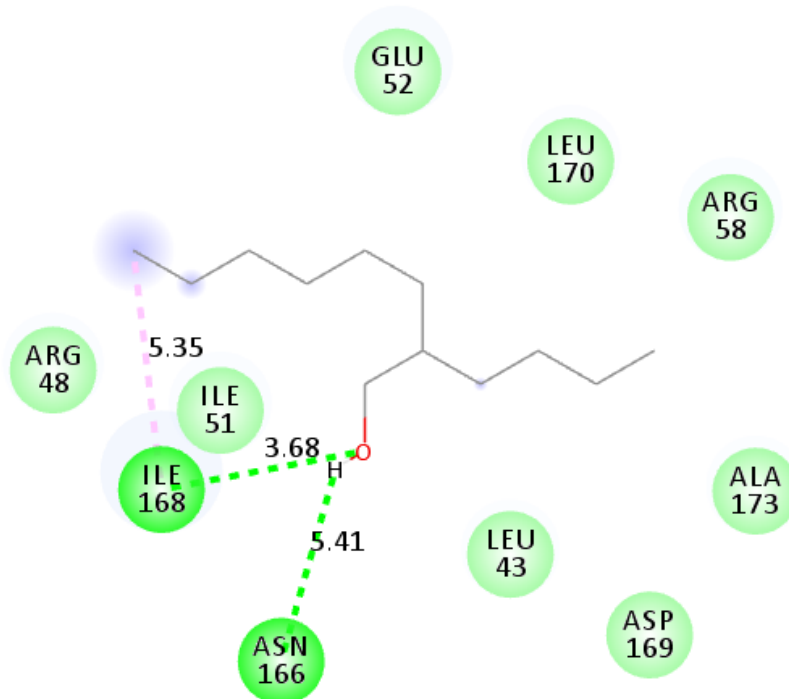

2D interaction pattern of OCT.

### Y103D

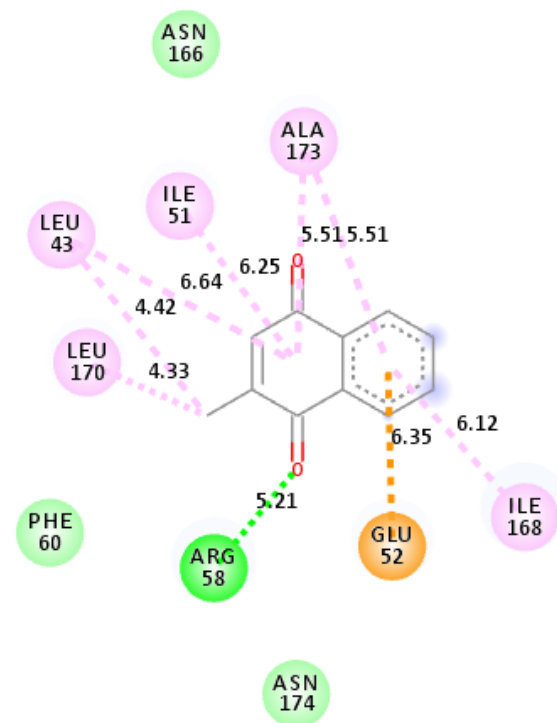

2D interaction pattern of MEN.

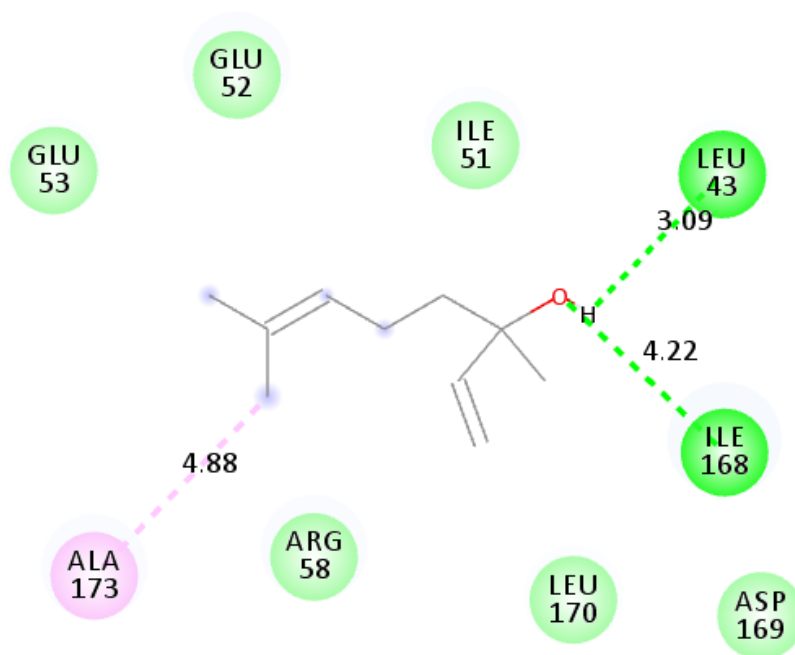

2D interaction pattern of LIN.



### Y103D

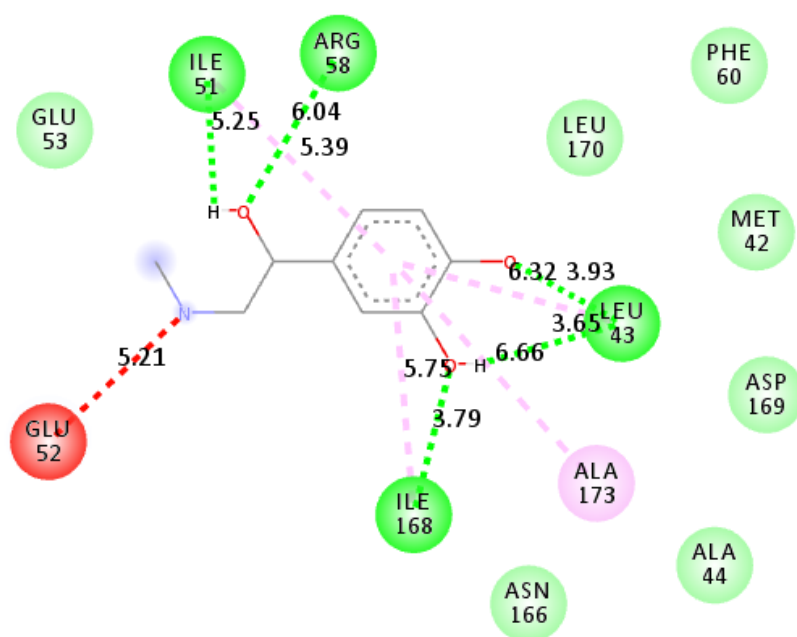

2D interaction pattern of L-ADR.

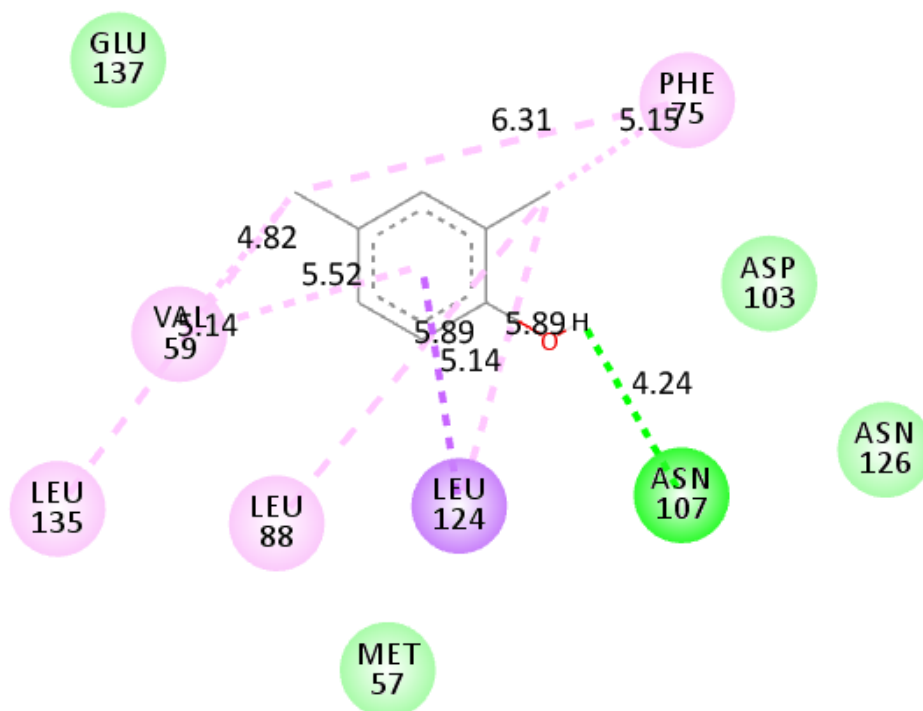

2D interaction pattern of 2,4-DMP.

### Y103R

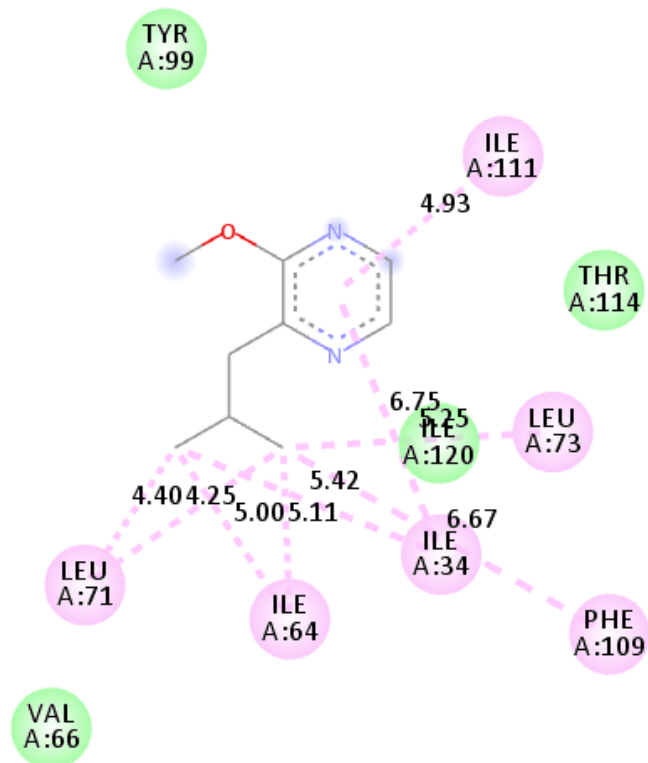

2D interaction pattern of PYR.

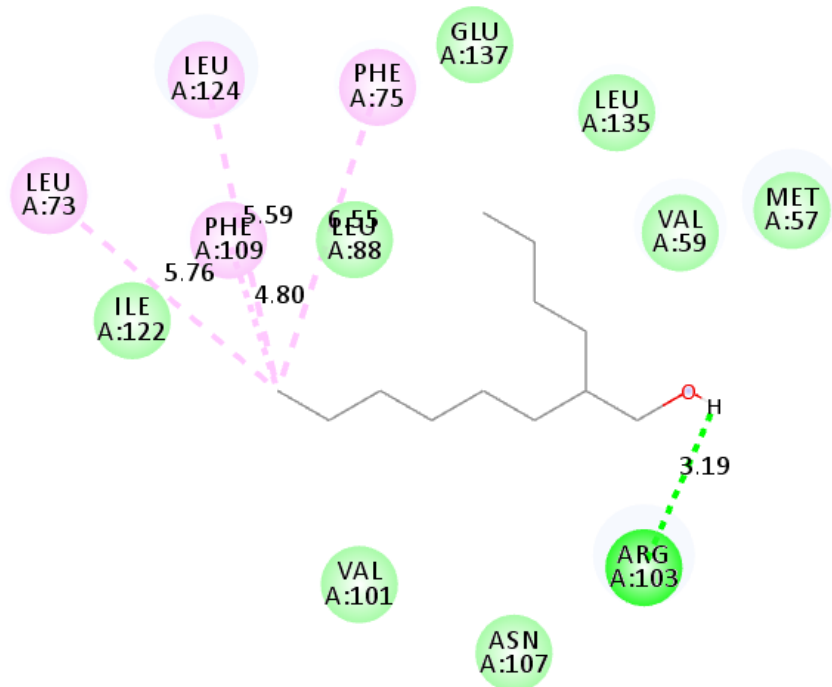

2D interaction pattern of OCT.

### Y103R

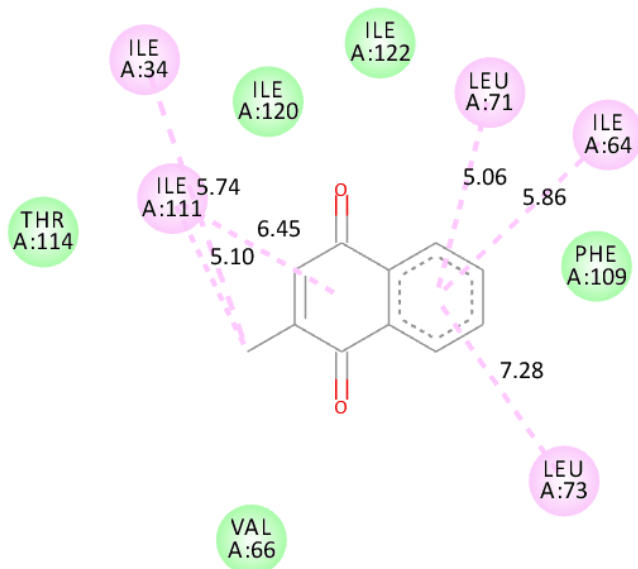

2D interaction pattern of MEN.

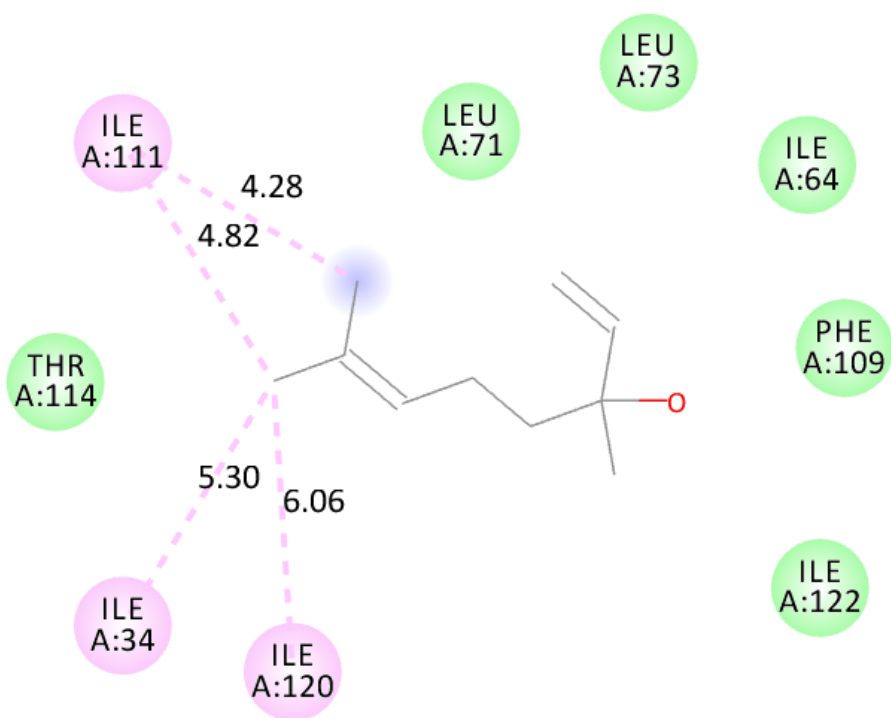

2D interaction pattern of LIN.

## Y103R

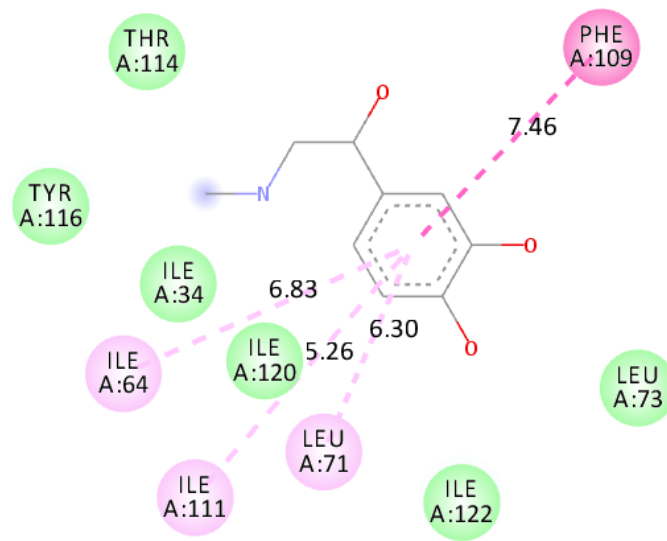

2D interaction pattern of L-ADR.

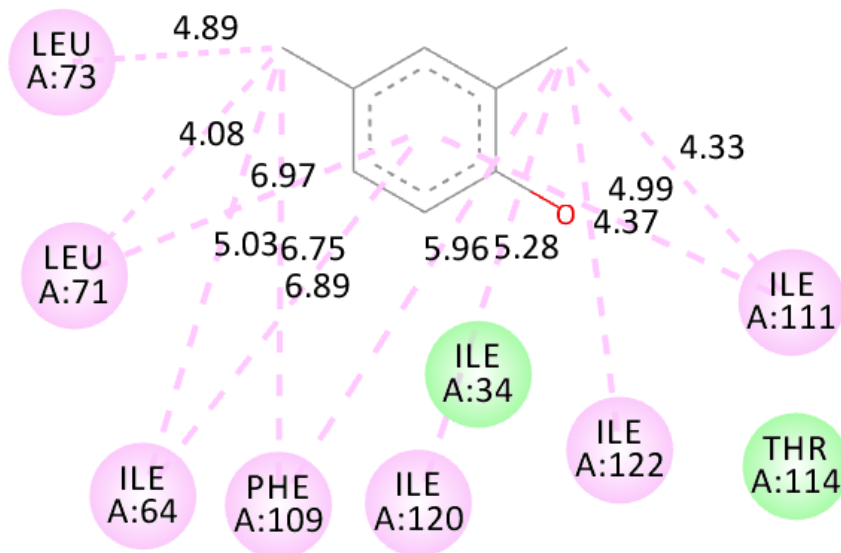

2D interaction pattern of 2,4-DMP.

### N107L

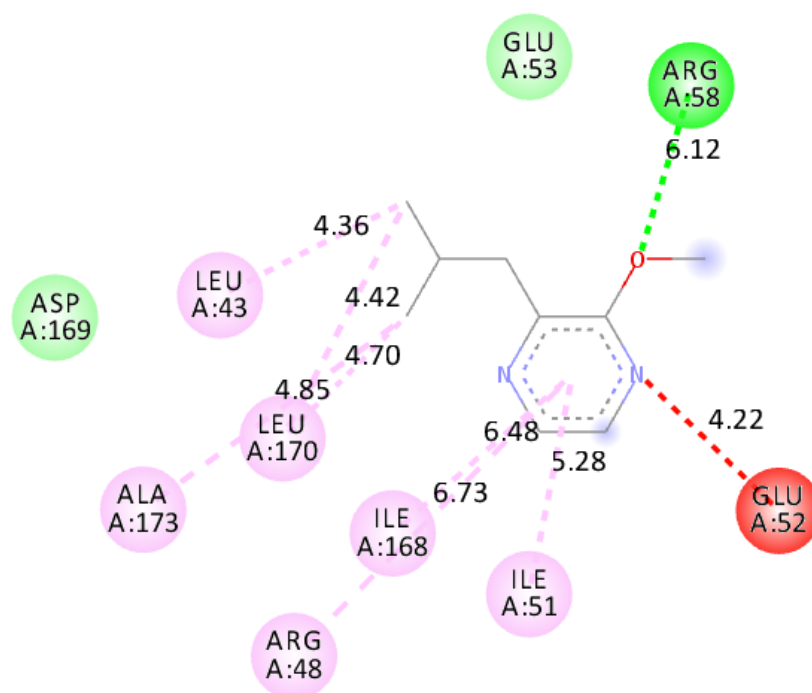

2D interaction pattern of PYR.

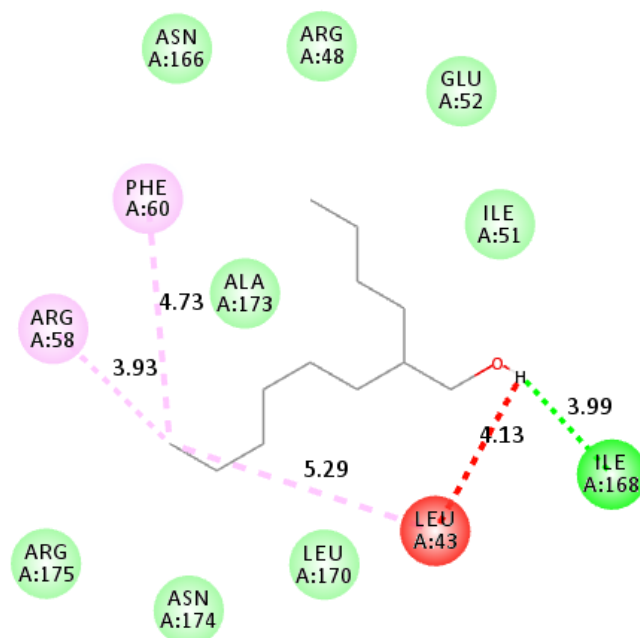

2D interaction pattern of OCT.

## N107L

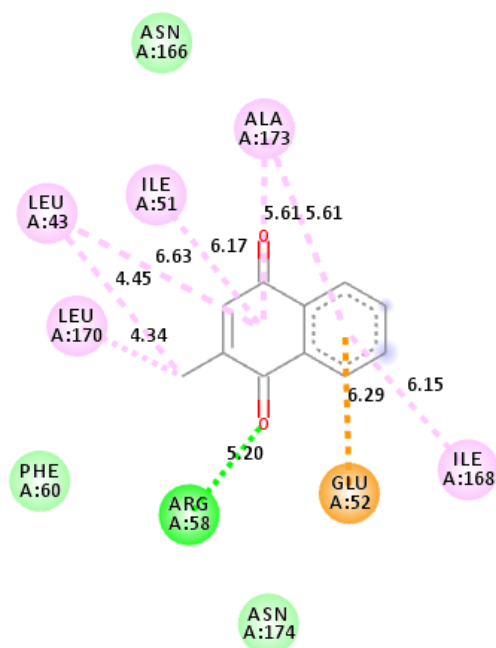

2D interaction pattern of MEN.

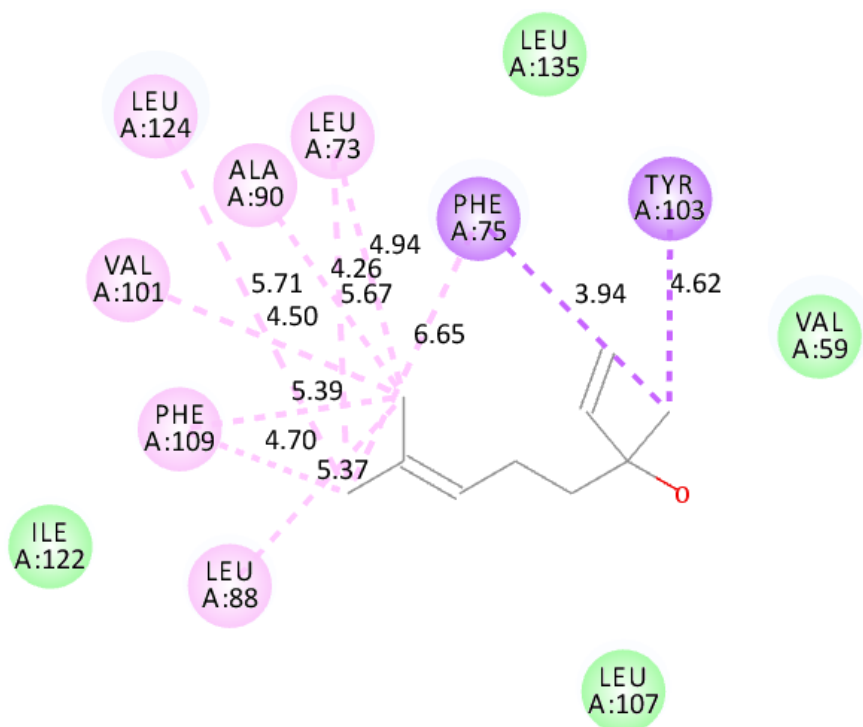

2D interaction pattern of LIN.

### N107L

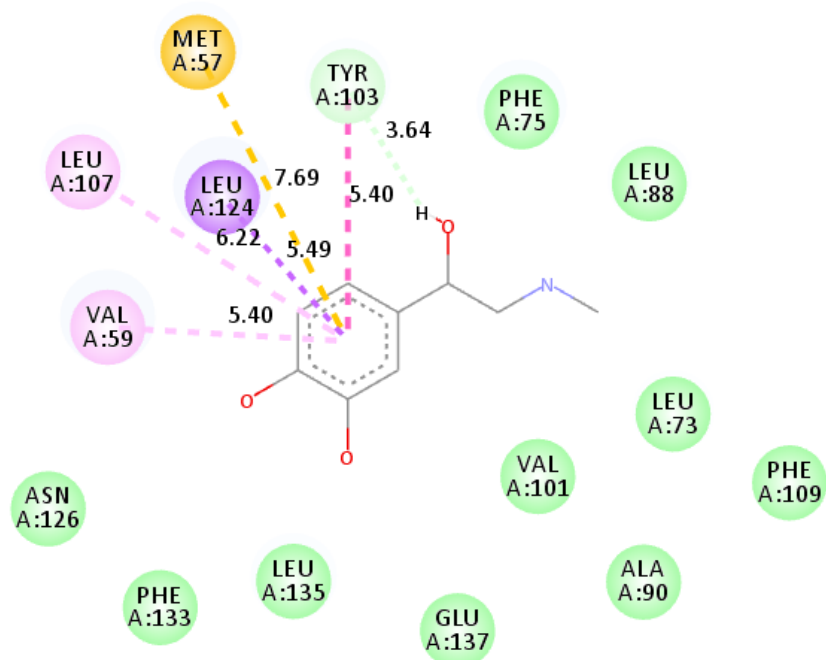

2D interaction pattern of L-ADR.

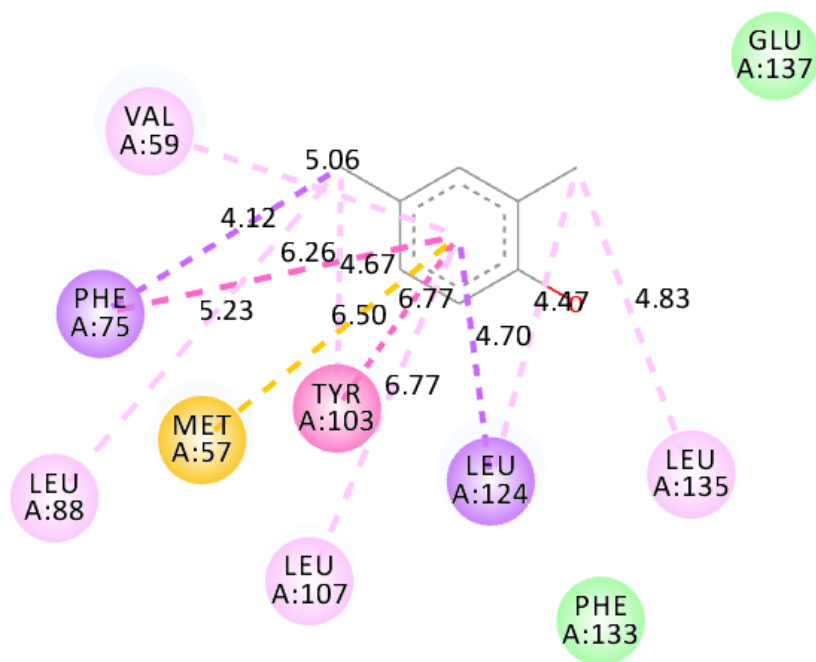

2D interaction pattern of 2,4-DMP.

### L124V

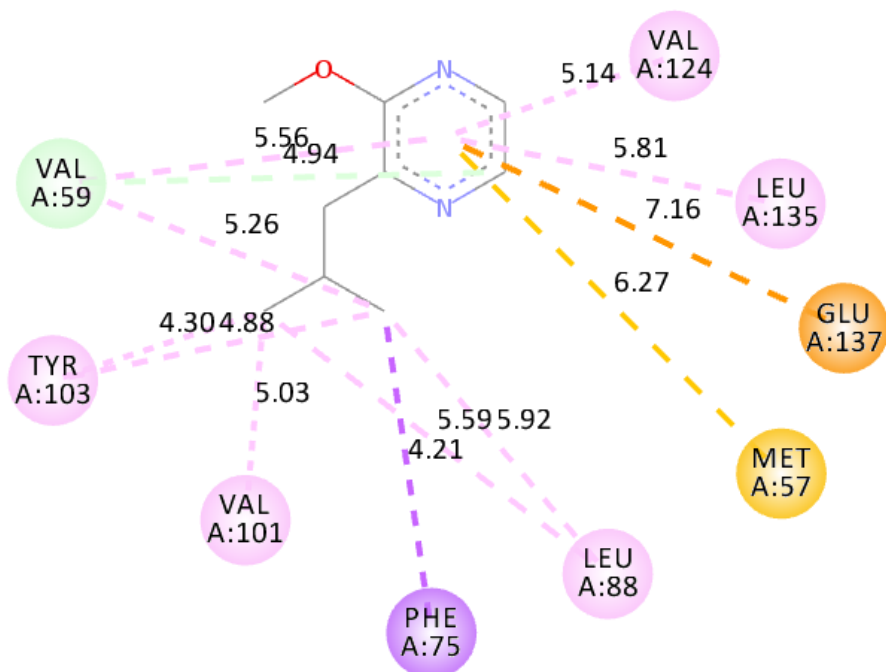

2D interaction pattern of PYR.

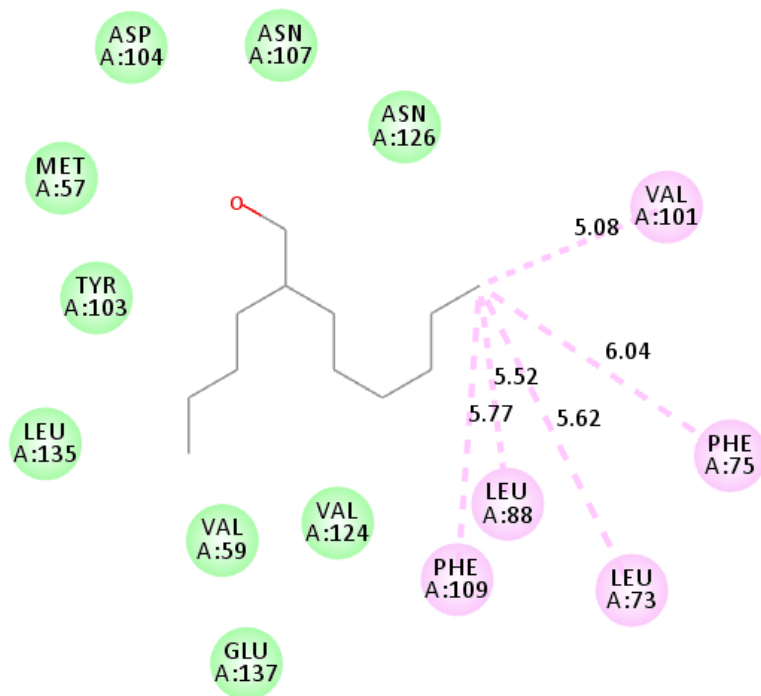

2D interaction pattern of OCT.



### L124V

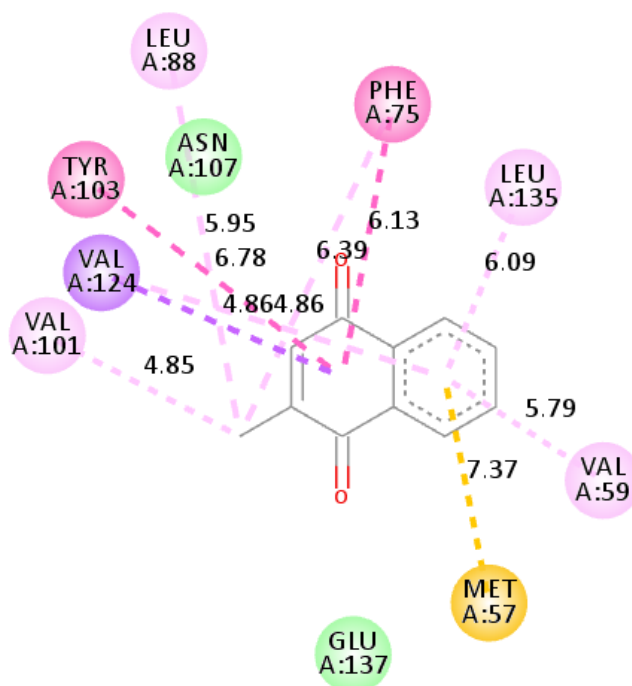

2D interaction pattern of MEN.

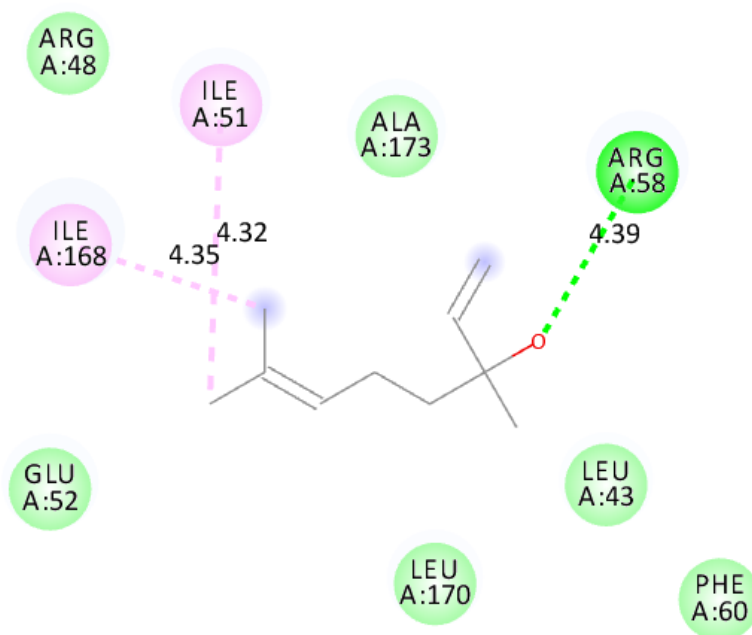

2D interaction pattern of LIN.

### L124V

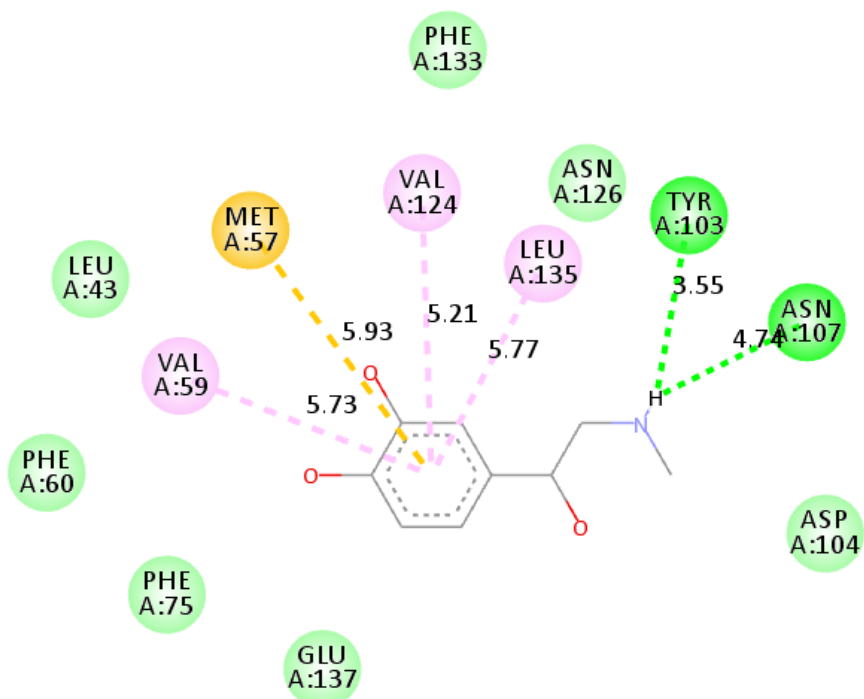

2D interaction pattern of L-ADR.

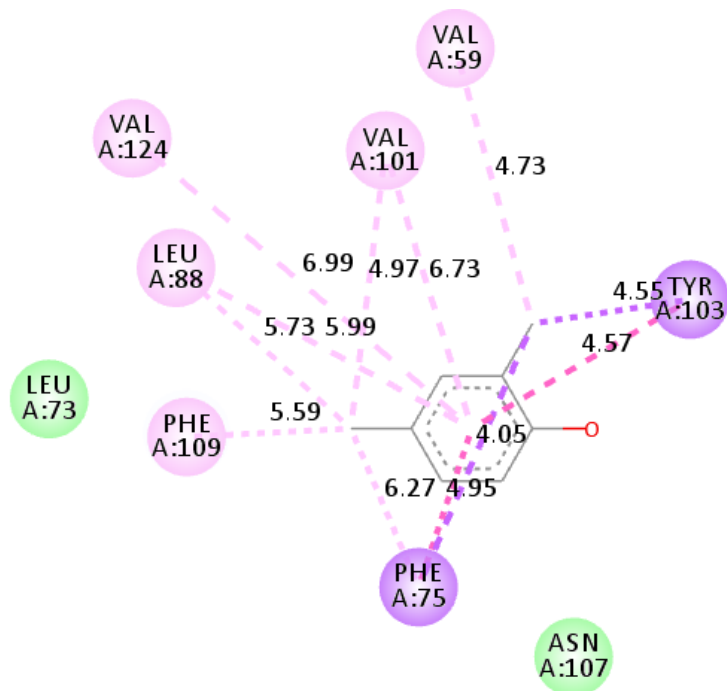

2D interaction pattern of 2,4-DMP.

### E137K

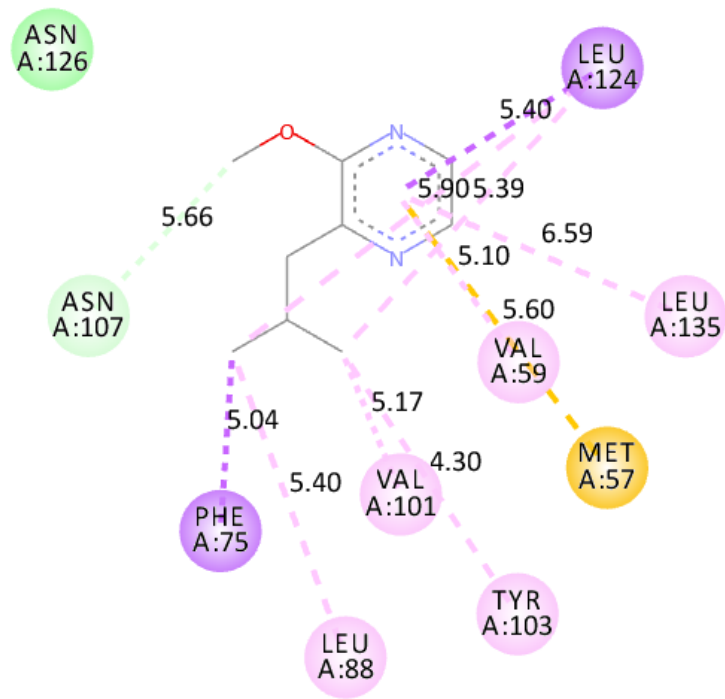

2D interaction pattern of PYR.

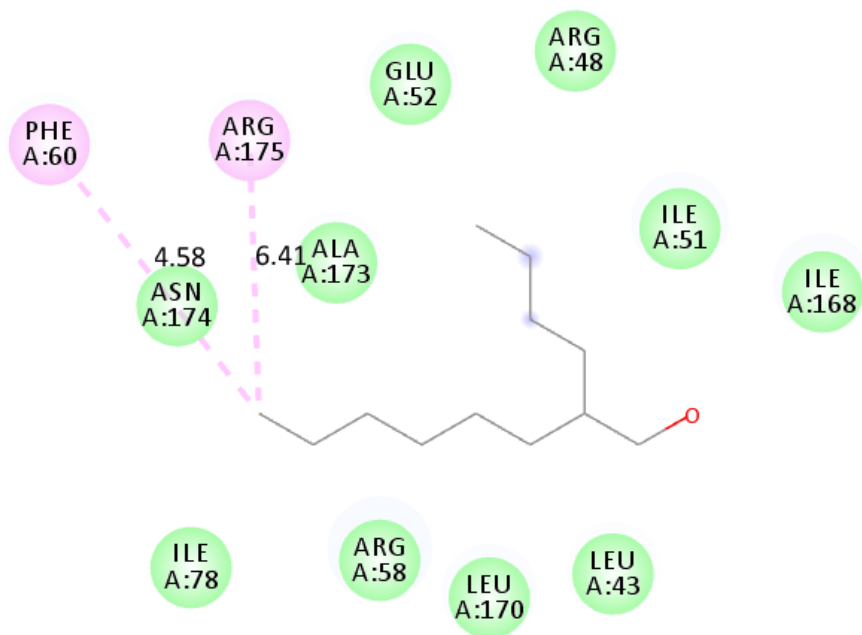

2D interaction pattern of OCT.

### E137K

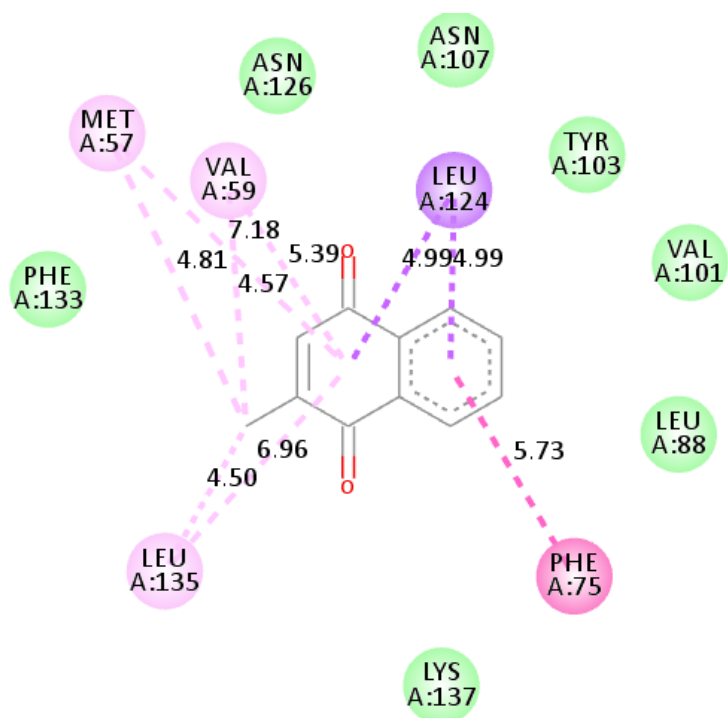

2D interaction pattern of MEN.

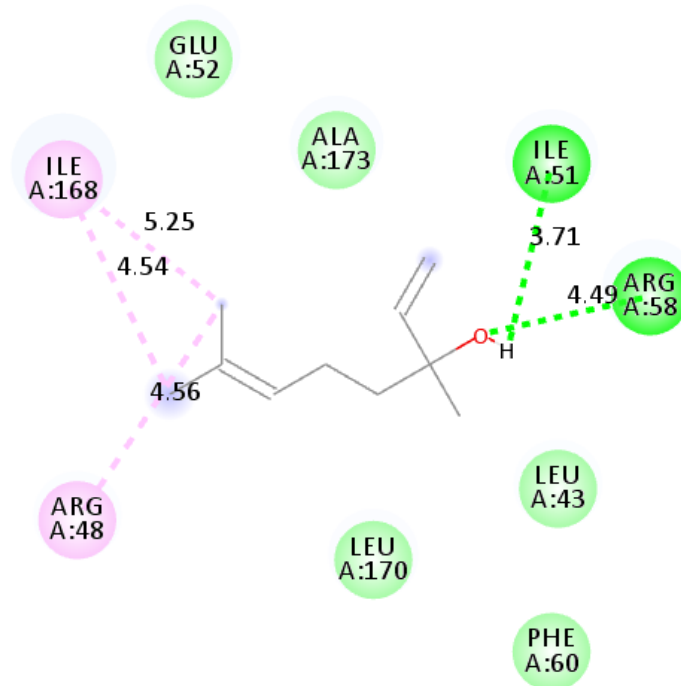

2D interaction pattern of LIN.

### E137K

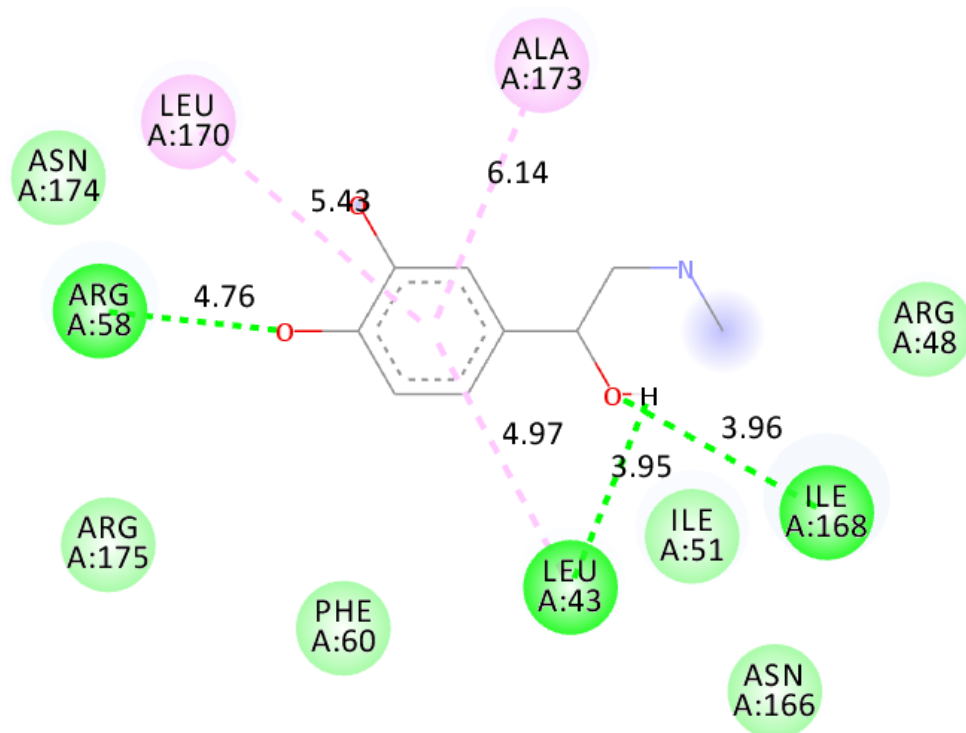

2D interaction pattern of L-ADR.

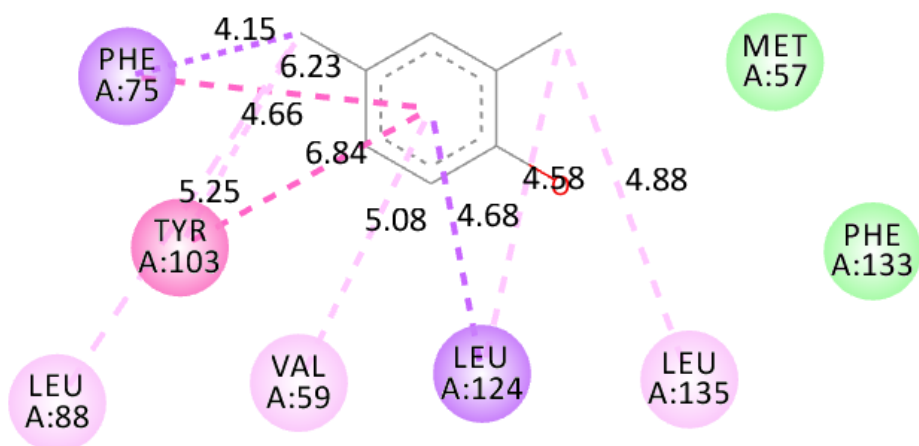

2D interaction pattern of 2,4-DMP.

**Analysis of interacting residues**

| Protein | Ligand  | Energy (-kcal/mol) | Interacting residues | Distance (Å) | Ligand-residue interaction |               |
|---------|---------|--------------------|----------------------|--------------|----------------------------|---------------|
| MUP20   | OCT     | 4.7                | Ile168               | 4.20         | hydrophobic                |               |
|         | MEN     | 7.5                | Met57                | 5.48         | hydrophobic                |               |
|         |         |                    | Val59                | 4.79         | hydrophobic                |               |
|         |         |                    | Leu124               | 3.37         | $\pi$ - $\sigma$           |               |
|         |         |                    | Leu135               | 3.74         | hydrophobic                |               |
|         |         |                    | Phe75                | 5.04         | $\pi$ - $\pi$              |               |
|         | PYR     | 5.9                | Asn107               | 3.37         | van der Waals              |               |
|         |         |                    | Val59                | 4.90         | $\pi$ -alkyl               |               |
|         |         |                    | Leu124               | 3.82         | $\pi$ - $\sigma$           |               |
|         |         |                    | Met57                | 5.20         | $\pi$ -sulfur              |               |
|         |         |                    | Leu135               | 4.52         | hydrophobic                |               |
|         |         |                    | Tyr103               | 4.61         | hydrophobic                |               |
|         |         |                    | Val101               | 4.87         | hydrophobic                |               |
|         |         |                    | Leu88                | 4.66         | hydrophobic                |               |
|         | LIN     | 6.0                | Phe75                | 3.90         | $\pi$ -alkyl               |               |
|         |         |                    | Val101               | 4.95         | hydrophobic                |               |
|         |         |                    | Leu124               | 4.65         | hydrophobic                |               |
|         |         |                    | Tyr103               | 4.52         | hydrophobic                |               |
|         |         |                    | Leu88                | 4.07         | hydrophobic                |               |
|         | L-ADR   | 5.7                | Arg58                | 2.54         | van der Waals              |               |
|         |         |                    | Asn174               | 2.08         | Hydrogen bond              |               |
|         |         |                    | Leu43                | 2.56         | Hydrogen bond              |               |
|         |         |                    | Ile51                | 5.45         | hydrophobic                |               |
|         |         |                    | Ala173               | 4.79         | hydrophobic                |               |
|         | 2,4-DMP | 6.4                | Met57                | 4.78         | hydrophobic                |               |
|         |         |                    | Leu124               | 3.77         | $\pi$ -alkyl               |               |
|         |         |                    | Val59                | 4.96         | hydrophobic                |               |
|         |         |                    | Tyr103               | 4.98         | $\pi$ - $\pi$              |               |
|         |         |                    | Leu88                | 4.46         | hydrophobic                |               |
|         |         |                    | Phe75                | 4.23         | $\pi$ - $\pi$              |               |
|         | V59T    | OCT                | 5.2                  | Ile168       | 3.84                       | Hydrogen bond |
|         |         |                    |                      | Leu43        | 4.13                       | Hydrogen bond |
| Ile51   |         |                    |                      | 4.76         | hydrophobic                |               |

|        |         |        |        |                  |               |  |
|--------|---------|--------|--------|------------------|---------------|--|
|        | MEN     | 7.7    | Met57  | 4.65             | hydrophobic   |  |
| Leu124 |         |        | 5.19   | $\pi$ - $\sigma$ |               |  |
| Leu135 |         |        | 4.75   | hydrophobic      |               |  |
|        |         |        |        |                  |               |  |
|        | PYR     | 5.1    | Leu43  | 4.42             | hydrophobic   |  |
|        |         |        | Glu52  | 4.26             | Hydrogen bond |  |
|        |         |        | Ile51  | 5.29             | $\pi$ -alkyl  |  |
|        |         |        | Ala173 | 4.84             | hydrophobic   |  |
|        |         |        | Leu170 | 4.46             | hydrophobic   |  |
|        |         |        |        |                  |               |  |
|        | LIN     | 5.0    | Arg58  | 5.15             | Hydrogen bond |  |
|        |         |        | Ile51  | 4.75             | hydrophobic   |  |
|        |         |        | Ile168 | 4.34             | hydrophobic   |  |
|        |         |        | Arg48  | 4.77             | hydrophobic   |  |
|        |         |        |        |                  |               |  |
|        | L-ADR   | 5.4    | Arg58  | 3.83             | Hydrogen bond |  |
|        |         |        | Ile51  | 3.37             | Hydrogen bond |  |
|        |         |        | Leu43  | 5.14             | $\pi$ -alkyl  |  |
|        |         |        |        |                  |               |  |
|        | 2,4-DMP | 6.4    | Thr59  | 3.65             | Hydrogen bond |  |
|        |         |        | Leu124 | 5.87             | $\pi$ -alkyl  |  |
|        |         |        | Val101 | 4.93             | hydrophobic   |  |
|        |         |        | Tyr103 | 5.72             | $\pi$ - $\pi$ |  |
|        |         |        | Leu88  | 5.29             | hydrophobic   |  |
|        |         |        | Phe75  | 4.51             | $\pi$ -alkyl  |  |
|        |         |        |        |                  |               |  |
|        |         |        |        |                  |               |  |
| L88Q   | OCT     | 5.0    | Ile168 | 2.94             | Hydrogen bond |  |
|        |         |        | Leu43  | 4.21             | Hydrogen bond |  |
|        |         |        | Ile51  | 4.46             | hydrophobic   |  |
|        |         |        |        |                  |               |  |
|        | MEN     | 6.4    | Leu43  | 4.46             | hydrophobic   |  |
|        |         |        | Arg58  | 5.20             | Hydrogen bond |  |
|        |         |        | Leu170 | 4.34             | hydrophobic   |  |
|        |         |        |        |                  |               |  |
|        | PYR     | 5.1    | Leu43  | 4.31             | hydrophobic   |  |
|        |         |        | Ile51  | 5.29             | $\pi$ -alkyl  |  |
|        |         |        | Ala173 | 4.90             | hydrophobic   |  |
|        |         |        | Leu170 | 4.72             | hydrophobic   |  |
|        |         |        |        |                  |               |  |
|        | LIN     | 5.8    | Leu73  | 4.31             | hydrophobic   |  |
|        |         |        | Val101 | 4.78             | hydrophobic   |  |
|        |         |        | Tyr103 | 4.22             | $\pi$ -alkyl  |  |
|        |         |        |        |                  |               |  |
| L-ADR  | 5.9     | Tyr103 | 3.54   | $\pi$ - $\pi$    |               |  |
|        |         | Phe75  | 5.26   | $\pi$ - $\pi$    |               |  |
|        |         |        |        |                  |               |  |

|       |         |     |        |             |               |
|-------|---------|-----|--------|-------------|---------------|
|       | 2,4-DMP | 6.3 | Leu135 | 4.86        | hydrophobic   |
|       |         |     | Leu124 | 4.71        | $\pi$ -alkyl  |
|       |         |     | Val59  | 4.68        | hydrophobic   |
|       |         |     | Phe75  | 4.17        | $\pi$ -alkyl  |
|       |         |     |        |             |               |
| Y103D | OCT     | 4.7 | Ile168 | 3.68        | Hydrogen bond |
|       |         |     | Asn166 | 5.41        | Hydrogen bond |
|       | MEN     | 6.4 | Ala173 | 5.50        | $\pi$ -alkyl  |
|       |         |     | Arg58  | 5.21        | Hydrogen bond |
|       |         |     | Leu170 | 4.33        | hydrophobic   |
|       |         |     | Leu43  | 4.42        | hydrophobic   |
|       | PYR     | 5.2 | Ile124 | 4.52        | $\pi$ -alkyl  |
|       |         |     | Leu135 | 5.25        | hydrophobic   |
|       |         |     | Leu88  | 4.88        | hydrophobic   |
|       |         |     | Phe75  | 3.91        | $\pi$ -alkyl  |
|       |         |     | Val59  | 4.30        | van der Waals |
|       | LIN     | 4.7 | Leu73  | 3.09        | Hydrogen bond |
|       |         |     | Ile168 | 4.78        | Hydrogen bond |
|       |         |     | Ala173 | 4.88        | hydrophobic   |
|       | L-ADR   | 5.2 | Leu43  | 3.93        | Hydrogen bond |
|       |         |     | Ile168 | 3.79        | Hydrogen bond |
|       |         |     | Glu52  | 5.21        | Hydrogen bond |
|       |         |     | Ile51  | 5.25        | Hydrogen bond |
|       | 2,4-DMP | 5.6 | Asn107 | 4.24        | Hydrogen bond |
|       |         |     | Leu124 | 5.14        | $\pi$ -alkyl  |
| Val59 |         |     | 4.82   | hydrophobic |               |
| Phe75 |         |     | 5.15   | hydrophobic |               |
|       |         |     |        |             |               |
| Y03R  | OCT     | 4.8 | Arg103 | 3.19        | Hydrogen bond |
|       |         |     | Phe109 | 4.80        | hydrophobic   |
|       | MEN     | 6.1 | Leu71  | 5.06        | $\pi$ -alkyl  |
|       |         |     | Ile111 | 5.10        | hydrophobic   |
|       | PYR     | 4.5 | Ile111 | 4.93        | $\pi$ -alkyl  |
|       |         |     | Ile34  | 5.25        | hydrophobic   |
|       |         |     | Ile64  | 5.11        | hydrophobic   |
|       |         |     | Leu71  | 4.40        | hydrophobic   |
|       | LIN     | 4.8 | Ile111 | 4.28        | hydrophobic   |
|       |         |     | Ile34  | 5.30        | hydrophobic   |



|         |         |        |        |               |               |  |
|---------|---------|--------|--------|---------------|---------------|--|
|         | L-ADR   | 4.5    | Ile111 | 5.26          | Hphp          |  |
|         |         |        |        |               |               |  |
|         | 2,4-DMP | 4.9    | Ile111 | 4.33          | hydrophobic   |  |
|         |         |        | Ile122 | 4.37          | hydrophobic   |  |
|         |         |        | Ile120 | 5.28          | hydrophobic   |  |
|         |         |        | Ile64  | 5.03          | hydrophobic   |  |
|         |         |        | Leu71  | 4.08          | hydrophobic   |  |
|         |         |        | Leu43  | 4.89          | hydrophobic   |  |
|         |         |        |        |               |               |  |
| N107L   | OCT     | 5.1    | Ile168 | 3.99          | Hydrogen bond |  |
|         |         |        | Leu43  | 4.13          | Hydrogen bond |  |
|         |         |        | Arg58  | 3.93          | hydrophobic   |  |
|         |         |        | Phe60  | 4.73          | hydrophobic   |  |
|         |         |        |        |               |               |  |
|         | MEN     | 6.4    | Arg58  | 5.20          | Hydrogen bond |  |
|         |         |        | Leu170 | 4.34          | hydrophobicb  |  |
|         |         |        | Leu43  | 4.45          | hydrophobic   |  |
|         |         |        |        |               |               |  |
|         | PYR     | 5.1    | Glu52  | 4.22          | Hydrogen bond |  |
|         |         |        | Ile51  | 5.28          | hydrophobic   |  |
|         |         |        | Ala173 | 4.85          | hydrophobic   |  |
|         |         |        | Leu43  | 4.36          | hydrophobic   |  |
|         |         |        | Leu170 | 4.70          | hydrophobic   |  |
|         |         |        |        |               |               |  |
|         | LIN     | 5.8    | Tyr103 | 4.62          | $\pi$ -alkyl  |  |
|         |         |        | Leu88  | 5.37          | hydrophobic   |  |
|         |         |        | Phe109 | 4.70          | hydrophobic   |  |
|         |         |        | Val101 | 4.50          | hydrophobic   |  |
|         |         |        | Leu73  | 4.94          | hydrophobic   |  |
|         |         |        | Phe75  | 3.94          | $\pi$ -alkyl  |  |
|         |         |        |        |               |               |  |
|         | L-ADR   | 5.3    | Tyr103 | 5.40          | $\pi$ - $\pi$ |  |
|         |         |        | Val59  | 5.40          | $\pi$ -alkyl  |  |
| Leu124  |         |        | 5.49   | $\pi$ -alkyl  |               |  |
|         |         |        |        |               |               |  |
| 2,4-DMP | 6.5     | Leu135 | 4.83   | hydrophobic   |               |  |
|         |         | Leu124 | 4.70   | $\pi$ -alkyl  |               |  |
|         |         | Tyr103 | 4.67   | $\pi$ -alkyl  |               |  |
|         |         | Phe75  | 5.23   | $\pi$ - $\pi$ |               |  |
|         |         | Val59  | 5.06   | hydrophobic   |               |  |
|         |         |        |        |               |               |  |
| L124V   | OCT     | 6.3    | Val101 | 5.08          | hydrophobic   |  |
|         |         |        |        |               |               |  |
|         | MEN     | 7.5    | Val101 | 4.85          | hydrophobic   |  |
|         |         |        | Val124 | 4.86          | hydrophobic   |  |

|         |       |     |        |        |               |               |
|---------|-------|-----|--------|--------|---------------|---------------|
|         |       |     | Tyr103 | 4.86   | hydrophobic   |               |
|         |       |     |        |        |               |               |
| PYR     | 6.0   |     | Val124 | 5.14   | $\pi$ -alkyl  |               |
|         |       |     | Phe75  | 4.21   | $\pi$ -alkyl  |               |
|         |       |     | Val101 | 5.03   | hydrophobic   |               |
|         |       |     | Tyr103 | 4.30   | hydrophobic   |               |
|         |       |     | Val59  | 4.94   | $\pi$ -alkyl  |               |
|         |       |     |        |        |               |               |
| LIN     | 5.2   |     | Arg58  | 4.38   | Hydrogen bond |               |
|         |       |     | Ile168 | 4.35   | hydrophobic   |               |
|         |       |     | Ile51  | 4.32   | hydrophobic   |               |
|         |       |     |        |        |               |               |
| L-ADR   | 6.1   |     | Tyr103 | 3.55   | Hydrogen bond |               |
|         |       |     | Asn107 | 4.74   | Hydrogen bond |               |
|         |       |     | Val124 | 5.21   | $\pi$ -alkyl  |               |
|         |       |     |        |        |               |               |
| 2,4-DMP | 6.1   |     | Val59  | 4.73   | hydrophobic   |               |
|         |       |     | Tyr103 | 4.57   | $\pi$ - $\pi$ |               |
|         |       |     | Phe75  | 4.95   | $\pi$ - $\pi$ |               |
|         |       |     | Val101 | 4.97   | hydrophobic   |               |
|         |       |     |        |        |               |               |
| E137K   | OCT   | 5.3 | Phe60  | 4.58   | hydrophobic   |               |
|         |       |     |        |        |               |               |
|         | MEN   | 7.4 |        | Leu124 | 4.99          | $\pi$ -alkyl  |
|         |       |     |        | Leu135 | 4.50          | hydrophobic   |
|         |       |     |        | Met57  | 4.57          | hydrophobic   |
|         |       |     |        |        |               |               |
|         | PYR   | 5.8 |        | Leu124 | 5.40          | $\pi$ -alkyl  |
|         |       |     |        | Val59  | 5.10          | hydrophobic   |
|         |       |     |        | Tyr103 | 4.30          | hydrophobic   |
|         |       |     |        | Val101 | 5.17          | hydrophobic   |
|         |       |     |        | Phe75  | 5.04          | $\pi$ -alkyl  |
|         |       |     |        |        |               |               |
|         | LIN   | 5.0 |        | Ile51  | 3.71          | Hydrogen bond |
|         |       |     |        | Arg58  | 4.49          | Hydrogen bond |
|         |       |     |        | Arg48  | 4.56          | hydrophobic   |
|         |       |     |        | Ile168 | 4.54          | hydrophobic   |
|         |       |     |        |        |               |               |
|         | L-ADR | 5.2 |        | Ile168 | 3.96          | Hydrogen bond |
|         |       |     |        | Leu43  | 3.95          | Hydrogen bond |
|         |       |     |        | Arg58  | 4.76          | Hydrogen bond |
|         |       |     | Leu170 | 5.43   | hydrophobic   |               |
|         |       |     |        |        |               |               |
| 2,4-DMP | 6.2   |     | Leu135 | 4.88   | hydrophobic   |               |
|         |       |     | Leu124 | 4.68   | $\pi$ -alkyl  |               |
|         |       |     | Tyr103 | 5.25   | $\pi$ -alkyl  |               |
|         |       |     | Phe75  | 4.15   | $\pi$ -alkyl  |               |

## Supplementary Material S2

### S2a. List of selected aminoacids for mutation and mutation scheme

V59, L88, Y103, N107, L124, E137.

#### Mutation and alignment Scheme

7 mutated proteins: MUP20V59T, MUP20L88Q, MUP20Y103D, MUP20Y103R, MUP20N107L, MUP20L124V, MUP20E137K.

```
CLUSTAL format alignment by MAFFT (v7.243)

MUP20wt      M----HHHHHMKLLVLLCLGLTLVCHVHAEASSMERNFNVEKINGEWYTIMLATDKRE
MUP20V59T    MMGSSHHHHHHIE-----GEEASSMERNFNVEKINGEWYTIMLATDKRE
MUP20L124V   MMGSSHHHHHHIE-----GEEASSMERNFNVEKINGEWYTIMLATDKRE
MUP20E137K   MMGSSHHHHHHIE-----GEEASSMERNFNVEKINGEWYTIMLATDKRE
MUP20L88Q    MMGSSHHHHHHIE-----GEEASSMERNFNVEKINGEWYTIMLATDKRE
MUP20N107L   MMGSSHHHHHHIE-----GEEASSMERNFNVEKINGEWYTIMLATDKRE
MUP20Y103R   MMGSSHHHHHHIE-----GEEASSMERNFNVEKINGEWYTIMLATDKRE
MUP20Y103D   MMGSSHHHHHHIE-----GEEASSMERNFNVEKINGEWYTIMLATDKRE
*      *****.:                *****

MUP20wt      KIEEHGSMRVFVEYIHVLENSLALKFHIIINEECSEIFLVADKTEKAGEYSVTYDGSNTF
MUP20V59T    KIEEHGSMRTFVEYIHVLENSLALKFHIIINEECSEIFLVADKTEKAGEYSVTYDGSNTF
MUP20L124V   KIEEHGSMRVFVEYIHVLENSLALKFHIIINEECSEIFLVADKTEKAGEYSVTYDGSNTF
MUP20E137K   KIEEHGSMRVFVEYIHVLENSLALKFHIIINEECSEIFLVADKTEKAGEYSVTYDGSNTF
MUP20L88Q    KIEEHGSMRVFVEYIHVLENSLALKFHIIINEECSEIFQVADKTEKAGEYSVTYDGSNTF
MUP20N107L   KIEEHGSMRVFVEYIHVLENSLALKFHIIINEECSEIFLVADKTEKAGEYSVTYDGSNTF
MUP20Y103R   KIEEHGSMRVFVEYIHVLENSLALKFHIIINEECSEIFLVADKTEKAGEYSVTRDGSNTF
MUP20Y103D   KIEEHGSMRVFVEYIHVLENSLALKFHIIINEECSEIFLVADKTEKAGEYSVTDGGSNTF
*****.*****

MUP20wt      TILKTDYDNYIMIHLINKKDGETFQLMELYGREPDLSSDIKEKFAQLSEEHGIVRENIID
MUP20V59T    TILKTDYDNYIMIHLINKKDGETFQLMELYGREPDLSSDIKEKFAQLSEEHGIVRENIID
MUP20L124V   TILKTDYDNYIMIHVINKKDGETFQLMELYGREPDLSSDIKEKFAQLSEEHGIVRENIID
MUP20E137K   TILKTDYDNYIMIHLINKKDGETFQLMKLYGREPDLSSDIKEKFAQLSEEHGIVRENIID
MUP20L88Q    TILKTDYDNYIMIHLINKKDGETFQLMELYGREPDLSSDIKEKFAQLSEEHGIVRENIID
MUP20N107L   TILKTDYDLYIMIHLINKKDGETFQLMELYGREPDLSSDIKEKFAQLSEEHGIVRENIID
MUP20Y103R   TILKTDYDNYIMIHLINKKDGETFQLMELYGREPDLSSDIKEKFAQLSEEHGIVRENIID
MUP20Y103D   TILKTDYDNYIMIHLINKKDGETFQLMELYGREPDLSSDIKEKFAQLSEEHGIVRENIID
*****.*****

MUP20wt      LTNANRCLEARE
MUP20V59T    LTNANRCLEARE
MUP20L124V   LTNANRCLEARE
MUP20E137K   LTNANRCLEARE
MUP20L88Q    LTNANRCLEARE
MUP20N107L   LTNANRCLEARE
MUP20Y103R   LTNANRCLEARE
MUP20Y103D   LTNANRCLEARE
*****
```

Figure S2a Clustal alignment of amino acid sequences

## S2b. Expression Procedure

For the heterologous expression 100µl of DE3 BL21 *E. coli* cells strains were used, after the preparation of competent bacteria, followed by a heat shock transformation with 10µl of ligation product containing the plasmid including the ampicillin resistance gene. Transformants carrying the plasmid for wild-type or mutant MUP20 were plated in LB-agar 100µg/ml ampicillin Petri dishes and incubated overnight at 37°C. In order to proceed with the small scale expression of the recombinant proteins, a set of single antibiotic resistant colony was selected to inoculate 5 ml of ampicillin-LB media and incubated with shaking 250 rpm at 37°C. The turbid liquid cultures (positives) were selected for the bacterial growing step.

From each liquid culture 750 µl were mixed with 75 ml of ampicillin-LB media, shaken at 300 rpm at 37°C until the OD600 reached 0.4-0.6. Subsequently, for transcription of the gene of interest, the protein expression was induced by isopropyl-b-D-thiogalactoside (0.4mM, BioChemica, EuroClone, Milan, Italy) and shaken at 350 rpm at 37°C for 3 hours. The liquid culture was centrifuged at 5000 rpm for 10', and pellets were collected and sampled to confirm the presence of the protein via SDS-page.

Figure S1b shows an example of MUP expression, SDS-PAGE (15% acrylamide) analysis of recombinant MUP under reducing conditions. Lane 1 depicts MUP20 L88Q before induction and lane 2 after induction. Lane 3 shows MUP20 L124V before induction and lane 4 after induction. On the right, molecular weight markers are shown. The original gel is shown in Figure S1c.

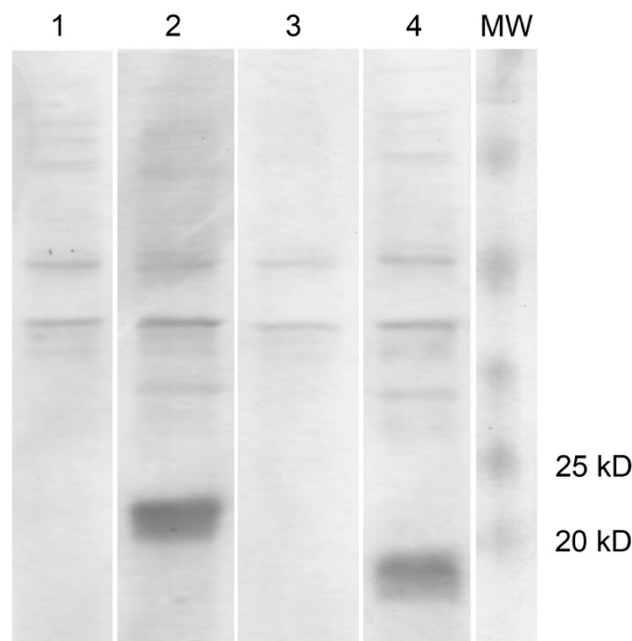

Figure S2b SDS-PAGE of recombinant MUPs

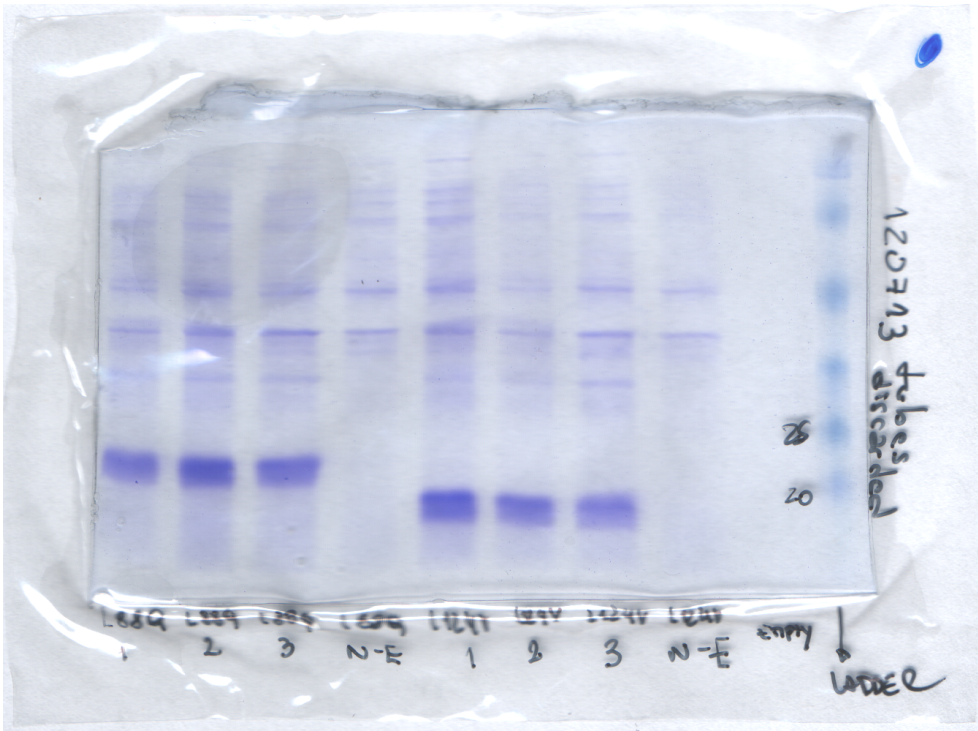

Figure S2c. Unmodified scanning of the gel showed in Fig. S1b.

### Supplementary Material S 3

#### Measured molecular weights from Mass Spectrometry and theoretical values

| MUP   | MW (experimental) – a.m.u | MW (theoretical) – a.m.u. |
|-------|---------------------------|---------------------------|
| WT    | 20625.2                   | 21883.97                  |
| L88Q  | 20621.4                   | 20682.16                  |
| L124V | 20653.5                   | 20653.16                  |
| Y103R | 20628.3                   | 20660.20                  |

### Supplementary Material S4. Measured Kd ( $\mu\text{M}$ )

|         | WT    |      | V59T |      | L88Q  |      | Y103D |      | Y103R |      | N107L |      | L124V |      | E137K |      |
|---------|-------|------|------|------|-------|------|-------|------|-------|------|-------|------|-------|------|-------|------|
| Ligand  | Kd    | SD   | Kd   | SD   | Kd    | SD   | Kd    | SD   | Kd    | SD   | Kd    | SD   | Kd    | SD   | Kd    | SD   |
| PYR     | 1.29  | 0.01 | 1.93 | 0.00 | 1.39  | 0.01 | 0.84  | 0.04 | 0.74  | 0.00 | 1.40  | 0.01 | 0.07  | 0.01 | 1.52  | 0.02 |
| LIN     | 2.82  | 0.04 | 1.60 | 0.00 | 2.21  | 0.01 | 2.17  | 0.06 | 5.93  | 0.11 | 1.37  | 0.02 | 0.29  | 0.01 | 1.85  | 0.05 |
| 2,4-DMP | 4.24  | 0.07 | 1.44 | 0.02 | 5.08  | 0.29 | 4.68  | 0.09 | 11.92 | 0.09 | 1.99  | 0.03 | 1.30  | 0.06 | 4.05  | 0.04 |
| OCT     | 0.78  | 0.00 | 1.54 | 0.02 | 1.45  | 0.03 | 0.92  | 0.01 | 1.88  | 0.01 | 2.67  | 0.08 | 0.36  | 0.00 | 3.20  | 0.01 |
| MEN     | 0.61* | 0.04 | 1.85 | 0.06 | 1.31* | 0.06 | 0.82* | 0.10 | 1.33* | 0.06 | 1.23  | 0.05 | 0.07* | 0.01 | 2.14  | 0.29 |
| L-ADR   | 5.31  | 0.06 | 0.87 | 0.01 | 11.24 | 0.58 | 3.34  | 0.25 | 7.06  | 0.23 | 0.90  | 0.03 | 1.33  | 0.06 | 4.07  | 0.45 |

\*data from Scorsone et al., IEEE Sensors Journal 2016, 16, 6543, Tab. 1.

## Supplementary Material S5. Binding data

|                        |                               | first | second |         |       | Ligand                        | first  | second |         |       |                                |
|------------------------|-------------------------------|-------|--------|---------|-------|-------------------------------|--------|--------|---------|-------|--------------------------------|
|                        |                               | Kd    | Kd     | Kd mean | Kd SD |                               | Ka - 1 | Ka - 2 | Ka mean | Ka SD |                                |
| <b>MUP20x6HisWT</b>    |                               |       |        |         |       |                               |        |        |         |       |                                |
|                        | Ligand                        |       |        |         |       | Ligand                        |        |        |         |       | =(IC-50/(1+1-NPNfree/1-NPNkd)) |
| 1.00 uM                | 2-isobutyl-3-methoxypropazine | 1.29  | 1.28   | 1.29    | 0.01  | 2-isobutyl-3-methoxypropazine | 0.77   | 0.78   | 0.78    | 0.01  |                                |
| 1.60 uM                | Linalool                      | 2.85  | 2.80   | 2.82    | 0.04  | Linalool                      | 0.35   | 0.36   | 0.35    | 0.01  | Kd 1-NPN                       |
|                        | 2,4-dimethylphenol            | 4.20  | 4.29   | 4.24    | 0.07  | 2,4-dimethylphenol            | 0.24   | 0.23   | 0.24    | 0.00  | 0.65                           |
|                        | 2-butyl-1-octanol             | 0.78  | 0.78   | 0.78    | 0.00  | 2-butyl-1-octanol             | 1.28   | 1.28   | 1.28    | 0.00  | 1+1-NPNfree/Kd                 |
|                        | MEN                           | 0.64  | 0.59   | 0.61    | 0.04  | MEN                           | 1.56   | 1.71   | 1.63    | 0.10  | 2.43                           |
|                        | L-ADR                         | 5.36  | 5.27   | 5.31    | 0.06  | L-ADR                         | 0.19   | 0.19   | 0.19    | 0.00  |                                |
| <b>MUP20x6HisV59T</b>  |                               |       |        |         |       |                               |        |        |         |       |                                |
|                        | Ligand                        |       |        |         |       | Ligand                        |        |        |         |       | =(IC-50/(1+1-NPNfree/1-NPNkd)) |
| 1.00 uM                | 2-isobutyl-3-methoxypropazine | 1.93  | 1.94   | 1.93    | 0.00  | 2-isobutyl-3-methoxypropazine | 0.52   | 0.52   | 0.52    | 0.00  |                                |
| 1.60 uM                | Linalool                      | 1.60  | 1.60   | 1.60    | 0.00  | Linalool                      | 0.63   | 0.62   | 0.62    | 0.00  | Kd 1-NPN                       |
|                        | 2,4-dimethylphenol            | 1.42  | 1.45   | 1.44    | 0.02  | 2,4-dimethylphenol            | 0.70   | 0.69   | 0.70    | 0.01  | 0.46                           |
|                        | 2-butyl-1-octanol             | 1.55  | 1.52   | 1.54    | 0.02  | 2-butyl-1-octanol             | 0.64   | 0.66   | 0.65    | 0.01  | 1+1-NPNfree/Kd                 |
|                        | Menadione                     | 1.89  | 1.80   | 1.85    | 0.06  | Menadione                     | 0.53   | 0.55   | 0.54    | 0.02  | 3.09                           |
|                        | L-Adrenaline                  | 0.86  | 0.88   | 0.87    | 0.01  | L-Adrenaline                  | 1.16   | 1.14   | 1.15    | 0.02  |                                |
| <b>MUP20x6HisL88Q</b>  |                               |       |        |         |       |                               |        |        |         |       |                                |
|                        | Ligand                        |       |        |         |       | Ligand                        |        |        |         |       | =(IC-50/(1+1-NPNfree/1-NPNkd)) |
| 1.00 uM                | 2-isobutyl-3-methoxypropazine | 1.39  | 1.40   | 1.39    | 0.01  | 2-isobutyl-3-methoxypropazine | 0.72   | 0.71   | 0.72    | 0.00  |                                |
| 1.60 uM                | Linalool                      | 2.21  | 2.20   | 2.21    | 0.01  | Linalool                      | 0.45   | 0.45   | 0.45    | 0.00  | Kd 1-NPN                       |
|                        | 2,4-dimethylphenol            | 5.28  | 4.88   | 5.08    | 0.29  | 2,4-dimethylphenol            | 0.19   | 0.21   | 0.20    | 0.01  | 2.07                           |
|                        | 2-butyl-1-octanol             | 1.48  | 1.43   | 1.45    | 0.03  | 2-butyl-1-octanol             | 0.68   | 0.70   | 0.69    | 0.02  | 1+1-NPNfree/Kd                 |
|                        | Menadione                     | 1.27  | 1.36   | 1.31    | 0.06  | Menadione                     | 0.79   | 0.74   | 0.76    | 0.04  | 1.46                           |
|                        | L-Adrenaline                  | 11.65 | 10.83  | 11.24   | 0.58  | L-Adrenaline                  | 0.09   | 0.09   | 0.09    | 0.00  |                                |
| <b>MUP20x6HisY103D</b> |                               |       |        |         |       |                               |        |        |         |       |                                |
|                        | Ligand                        |       |        |         |       | Ligand                        |        |        |         |       | =(IC-50/(1+1-NPNfree/1-NPNkd)) |
| 1.00 uM                | 2-isobutyl-3-methoxypropazine | 0.87  | 0.82   | 0.84    | 0.04  | 2-isobutyl-3-methoxypropazine | 1.15   | 1.22   | 1.18    | 0.05  |                                |
| 1.60 uM                | Linalool                      | 2.21  | 2.13   | 2.17    | 0.06  | Linalool                      | 0.45   | 0.47   | 0.46    | 0.01  | Kd 1-NPN                       |
|                        | 2,4-dimethylphenol            | 4.61  | 4.74   | 4.68    | 0.09  | 2,4-dimethylphenol            | 0.22   | 0.21   | 0.21    | 0.00  | 1.57                           |
|                        | 2-butyl-1-octanol             | 0.91  | 0.92   | 0.92    | 0.01  | 2-butyl-1-octanol             | 1.09   | 1.08   | 1.09    | 0.01  | 1+1-NPNfree/Kd                 |
|                        | Menadione                     | 0.75  | 0.89   | 0.82    | 0.10  | Menadione                     | 1.32   | 1.12   | 1.22    | 0.15  | 1.55                           |
|                        | L-Adrenaline                  | 3.17  | 3.52   | 3.34    | 0.25  | L-Adrenaline                  | 0.32   | 0.28   | 0.30    | 0.02  |                                |
| <b>MUP20x6HisY103R</b> |                               |       |        |         |       |                               |        |        |         |       |                                |
|                        | Ligand                        |       |        |         |       | Ligand                        |        |        |         |       | =(IC-50/(1+1-NPNfree/1-NPNkd)) |
| 1.00 uM                | 2-isobutyl-3-methoxypropazine | 0.74  | 0.74   | 0.74    | 0.00  | 2-isobutyl-3-methoxypropazine | 1.36   | 1.36   | 1.36    | 0.00  |                                |
| 1.60 uM                | Linalool                      | 5.86  | 6.01   | 5.93    | 0.11  | Linalool                      | 0.17   | 0.17   | 0.17    | 0.00  | Kd 1-NPN                       |
|                        | 2,4-dimethylphenol            | 11.86 | 11.98  | 11.92   | 0.09  | 2,4-dimethylphenol            | 0.08   | 0.08   | 0.08    | 0.00  | 4.39                           |
|                        | 2-butyl-1-octanol             | 1.88  | 1.88   | 1.88    | 0.01  | 2-butyl-1-octanol             | 0.53   | 0.53   | 0.53    | 0.00  | 1+1-NPNfree/Kd                 |
|                        | Menadione                     | 1.37  | 1.29   | 1.33    | 0.06  | Menadione                     | 0.73   | 0.77   | 0.75    | 0.03  | 1.21                           |
|                        | L-Adrenaline                  | 7.22  | 6.90   | 7.06    | 0.23  | L-Adrenaline                  | 0.14   | 0.14   | 0.14    | 0.00  |                                |
| <b>MUP20x6HisN107L</b> |                               |       |        |         |       |                               |        |        |         |       |                                |
|                        | Ligand                        |       |        |         |       | Ligand                        |        |        |         |       | =(IC-50/(1+1-NPNfree/1-NPNkd)) |
| 1.00 uM                | 2-isobutyl-3-methoxypropazine | 1.40  | 1.39   | 1.40    | 0.01  | 2-isobutyl-3-methoxypropazine | 0.71   | 0.72   | 0.72    | 0.00  |                                |
| 1.60 uM                | Linalool                      | 1.39  | 1.36   | 1.37    | 0.02  | Linalool                      | 0.72   | 0.74   | 0.73    | 0.01  | Kd 1-NPN                       |
|                        | 2,4-dimethylphenol            | 1.97  | 2.01   | 1.99    | 0.03  | 2,4-dimethylphenol            | 0.51   | 0.50   | 0.50    | 0.01  | 0.85                           |
|                        | 2-butyl-1-octanol             | 2.73  | 2.62   | 2.67    | 0.08  | 2-butyl-1-octanol             | 0.37   | 0.38   | 0.37    | 0.01  | 1+1-NPNfree/Kd                 |
|                        | Menadione                     | 1.19  | 1.27   | 1.23    | 0.05  | Menadione                     | 0.84   | 0.79   | 0.81    | 0.03  | 2.05                           |
|                        | L-Adrenaline                  | 0.92  | 0.88   | 0.90    | 0.03  | L-Adrenaline                  | 1.09   | 1.14   | 1.11    | 0.03  |                                |
| <b>MUP20x6HisL124V</b> |                               |       |        |         |       |                               |        |        |         |       |                                |
|                        | Ligand                        |       |        |         |       | Ligand                        |        |        |         |       | =(IC-50/(1+1-NPNfree/1-NPNkd)) |
| 1.00 uM                | 2-isobutyl-3-methoxypropazine | 0.06  | 0.07   | 0.07    | 0.01  | 2-isobutyl-3-methoxypropazine | 17.00  | 13.42  | 15.21   | 2.53  |                                |
| 1.60 uM                | Linalool                      | 0.30  | 0.29   | 0.29    | 0.01  | Linalool                      | 3.34   | 3.46   | 3.40    | 0.09  | Kd 1-NPN                       |
|                        | 2,4-dimethylphenol            | 1.34  | 1.26   | 1.30    | 0.06  | 2,4-dimethylphenol            | 0.74   | 0.79   | 0.77    | 0.03  | 0.22                           |
|                        | 2-butyl-1-octanol             | 0.36  | 0.36   | 0.36    | 0.00  | 2-butyl-1-octanol             | 2.79   | 2.76   | 2.78    | 0.02  | 1+1-NPNfree/Kd                 |
|                        | Menadione                     | 0.06  | 0.07   | 0.07    | 0.01  | Menadione                     | 17.49  | 13.34  | 15.42   | 2.93  | 5.03                           |
|                        | L-Adrenaline                  | 1.29  | 1.37   | 1.33    | 0.06  | L-Adrenaline                  | 0.78   | 0.73   | 0.75    | 0.03  |                                |
| <b>MUP20x6HisE137K</b> |                               |       |        |         |       |                               |        |        |         |       |                                |
|                        | Ligand                        |       |        |         |       | Ligand                        |        |        |         |       | =(IC-50/(1+1-NPNfree/1-NPNkd)) |
| 1.00 uM                | 2-isobutyl-3-methoxypropazine | 1.51  | 1.54   | 1.52    | 0.02  | 2-isobutyl-3-methoxypropazine | 0.66   | 0.65   | 0.66    | 0.01  |                                |
| 1.60 uM                | Linalool                      | 1.82  | 1.89   | 1.85    | 0.05  | Linalool                      | 0.55   | 0.53   | 0.54    | 0.01  | Kd 1-NPN                       |
|                        | 2,4-dimethylphenol            | 4.02  | 4.07   | 4.05    | 0.04  | 2,4-dimethylphenol            | 0.25   | 0.25   | 0.25    | 0.00  | 1.36                           |
|                        | 2-butyl-1-octanol             | 3.19  | 3.20   | 3.20    | 0.01  | 2-butyl-1-octanol             | 0.31   | 0.31   | 0.31    | 0.00  | 1+1-NPNfree/Kd                 |
|                        | Menadione                     | 1.93  | 2.34   | 2.14    | 0.29  | Menadione                     | 0.52   | 0.43   | 0.47    | 0.06  | 1.65                           |
|                        | L-Adrenaline                  | 3.75  | 4.39   | 4.07    | 0.45  | L-Adrenaline                  | 0.27   | 0.23   | 0.25    | 0.03  |                                |
